## MFGE8 links absorption of dietary fatty acids with catabolism of enterocyte lipid stores through HNF4 $\gamma$ -dependent transcription of CES enzymes

Authors:

Ritwik Datta<sup>1</sup>, Mohammad A Gholampour<sup>1</sup>, Christopher D Yang<sup>1</sup>, Regan Volk<sup>1</sup>, Sinan Lin<sup>2</sup>, Michael J Podolsky<sup>1</sup>, Thomas Arnold<sup>3</sup>, Florian Rieder<sup>2</sup>, Balyn W. Zaro<sup>1</sup>, Michael Verzi<sup>4</sup>, Richard Lehner<sup>5</sup>, Nada Abumrad<sup>6</sup>, Carlos O Lizama<sup>1</sup>, Kamran Atabai<sup>1,7</sup>

Author affiliations:

1. Cardiovascular Research Institute, University of California San Francisco, USA
2. Department of Gastroenterology, Hepatology and Nutrition, Digestive Diseases and Surgery Institute; Department of Inflammation and Immunity, Lerner Research Institute; Cleveland Clinic, Cleveland, USA
3. Department of pediatrics, University of California San Francisco, USA
4. Rutgers University, USA
5. Department of Pediatrics, University of Alberta, Canada
6. Washington University School of Medicine in St. Louis, USA
7. Lung biology Center, University of California San Francisco, USA

### ABSTRACT

Enterocytes modulate the extent of postprandial lipemia, a potent risk factor for developing atherosclerotic disease, by storing dietary fats in cytoplasmic lipid droplets (cLDs). We have previously demonstrated that the integrin ligand MFGE8 links absorption of dietary fats with activation of triglyceride (TG) hydrolases that catabolize cLDs for chylomicron production. The hydrolase(s) responsible for mobilization of TG from diet-derived cLDs is unknown though recent evidence indicates that this process is independent of the canonical pathway of TG hydrolysis mediated by ATGL. Here we identify CES1D as the key hydrolase downstream of the MFGE8- $\alpha$ v $\beta$ 5 integrin pathway that regulates catabolism of diet-drive cLDs. *Mfge8* KO enterocytes have reduced CES1D transcript and protein levels and reduced protein levels of the transcription factor HNF4 $\gamma$ . Mice KO for *Ces1d* or *Hnf4 $\gamma$*  have decreased enterocyte TG hydrolase activity coupled with retention of TG in cLDs. Mechanistically, MFGE8-dependent fatty acid uptake through CD36 leads to stabilization of HNF4 $\gamma$  protein levels; HNF4 $\gamma$  then increases *Ces1d* transcription. Our work identifies a regulatory network by which MFGE8 and  $\alpha$ v $\beta$ 5 regulate the severity of postprandial lipemia by linking dietary fat absorption with protein stabilization of a transcription factor that increases expression of enterocyte TG hydrolases that catabolize diet-derived cLDs.

## INTRODUCTION

Intestinal lipid homeostasis has important implications for the development of atherosclerotic heart disease (1, 2). In addition to absorbing nutrients, the small intestine functions as a lipid storage organ that can limit postprandial serum lipid levels by storing a proportion of absorbed fats in cytoplasmic lipid droplets (cLDs), (3, 4). The clinical relevance of this under-appreciated small intestinal function is evident by the stronger correlation of postprandial lipid levels with coronary artery disease as compared with more commonly measured fasting serum lipid levels (2). In obesity, insulin resistance at the level of the intestine removes the suppressive effect of insulin on chylomicron production resulting in more severe postprandial lipemia (7). Humans with visceral obesity also demonstrate more severe postprandial lipemia and an increased risk of cardiovascular disease (8).

cLDs are increasingly recognized as dynamic organelles with pleiotropic functions that include prevention of fatty acid-induced lipotoxicity, serving as platforms for protein binding and degradation, and providing a reservoir for hydrophobic molecules important in numerous cellular functions. The small intestine is unique in that enterocytes contain distinct pools of cLDs derived from dietary fat or from lipids taken up from the basolateral circulation (5, 6). Our current understanding of cytoplasmic lipid droplet (cLD) metabolism is primarily derived from work done in adipocytes and hepatocytes, including the identification of several molecules that associate with and regulate hydrolysis of triglycerides (TG) in cLDs. Adipocyte triglyceride lipase (ATGL) is the predominant intracellular hydrolase responsible for cleaving intracellular TG to diacylglycerol (7) and *Atgl* KO mice accumulating TG in multiple tissues (8). ATGL and its co-activator CGI-58 are central to a molecular complex including the perilipin family of proteins and G0S2 that orchestrate cLD catabolism in adipocytes as well as other tissue compartments.

Recent work in enterocytes indicates that the ATGL/CGI-58 pathway is active in regulating catabolism of enterocyte cLDs derived from the basolateral circulation but not those derived from the diet (9). Of note, these authors reported an increase in transcript of members of the Carboxylesterase (Ces) family of hydrolases in the intestine of *Atgl/CGI-58* KO mice suggesting that these molecules may be involved in enterocyte cLD hydrolysis. The hydrolase(s) that regulate catabolism of cytoplasmic lipid droplets derived from dietary sources has not been identified.

We recently identified roles for the integrin ligand Milk Fat Globule Epidermal Growth Factor like 8 (MFGE8) and its receptor, the  $\alpha v\beta 5$  integrin, in intestinal lipid homeostasis. The MFGE8/integrin pathway links absorption of dietary fats with catabolism of small intestinal cLDs by promoting both enterocyte uptake of diet-derived luminal fats (10) and increased activity of enterocyte TG hydrolases resulting in TG mobilization from cLDs for chylomicron production (11). Interestingly, unlike in the intestine, TG hydrolase activity is unaffected in white adipose tissue or liver of *Mfge8* KO mice (11) suggesting that enterocyte specific pathways regulate catabolism of diet-derived cLDs. In this work we investigated the molecular pathway through which MFGE8 regulates catabolism of enterocyte cLDs. We identify CES1D, a member of the Ces family of lipases, as the key hydrolase that functions downstream of MFGE8-integrin to mobilize fatty acids from cLD TG stores and regulate chylomicron production. We further show that dietary oleic acid increases expression and activity of CES enzymes through stabilizing protein levels of the transcription factor HNF4 $\gamma$ . The findings provide novel insight into intestinal regulation of postprandial lipid levels.

## RESULTS

### ***MFGE8 regulates the expression and activity of CES hydrolases***

We have previously published that MFGE8 increases enterocyte TG hydrolase activity (11). To determine whether this effect is mediated through ATGL we isolated enterocytes from *Atgl* KO mice and assessed the

effect of recombinant MFGE8 (rMfge8) on TG hydrolase activity. rMFGE8 significantly increased TG hydrolase activity in *Atgl* KO enterocytes and the effect size was similar to that of rMFGE8 on WT enterocyte TG hydrolase activity (supplementary figure 1) and *Mfge8* KO enterocyte TG activity (11). We interpret these data to indicate that the effect of MFGE8 on enterocyte TG hydrolase activity does not require ATGL.

We next took an unbiased approach to investigate which enterocyte TG hydrolases are regulated by MFGE8. We performed 3' tag RNA sequencing of jejunal enterocytes isolated from WT and *Mfge8* KO mice and identified 530 differentially regulated genes (Figure 1A, Accession no. GSE200320). Ingenuity pathway analysis of these genes showed enrichment for triacylglycerol degradation related signaling (Figure 1B). Interestingly, we observed downregulation of several genes coding for hydrolases belonging to the CES1 family of enzymes in *Mfge8* KO mice (Figure 1C). We next performed activity-based staining (12) in WT and *Mfge8* KO intestinal cryosections using a fluorescently-labeled fluorophosphonate probe (TAMRA-FP) that binds the active confirmation of serine hydrolases. Cryosections from *Mfge8* KO mice showed markedly reduced fluorescence as compared with WT controls (Figure 1D) consistent with lower TG hydrolase activity. To further investigate which CES hydrolases had decreased activity in *Mfge8* KO enterocytes, we performed activity-based protein profiling (ABPP) with a serine hydrolase-specific fluorophosphonate biotin probe (FP-biotin) (13, 14). Consistent with our sequencing data, we found decreased activity for a subset of CES1 enzymes in *Mfge8* KO samples (Figure 1E, Accession no. MSV000089304). We interpret these data to indicate that MFGE8 regulates intestinal TG hydrolase activity through expression of CES family of enzymes.

### ***MFGE8 regulates the expression of CES hydrolases through the transcription factor HNF4γ***

We next utilized the iRegulon database to identify putative candidate transcription factors that could mediate the effect of MFGE8 on *Ces* gene expression and cross-referenced these with transcription factor expression in WT enterocytes from our 3' Tag RNA seq data. From this analysis, we found highest expression of the HNF4 family of transcription factors (that consist of *Hnf4α* and *Hnf4γ*) in WT enterocytes (Figure 2A). We subsequently analyzed available RNA sequencing data from a recent publication comparing gene expression of WT, *Hnf4γ* KO, and *Hnf4α* KO murine enterocytes (15). We found altered expression of multiple *Ces1* family genes in *Hnf4γ* KO (Figure 2B) but not in *Hnf4α* KO enterocytes (data not shown).

Next, we performed activity-based staining of serine hydrolases in WT and *Hnf4γ* KO intestinal cryosections and found a marked reduction in the hydrolase signal in the *Hnf4γ* KO group (Figure 2C). We also performed ABPP with FP-biotin and found that loss of HNF4γ led to reduced enzymatic activity of multiple CES1 subfamilies (Figure 2D, Accession no. MSV000089304) including CES1D. We next studied whether MFGE8 regulates HNF4γ transcript or protein expression. HNF4γ transcript was unchanged in *Mfge8* KO and WT jejunal enterocytes in our 3' Tag RNA sequencing data set (Accession no. GSE200320). However, there was a marked reduction in HNF4γ protein levels in *Mfge8* KO enterocytes (Figure 2E-F). We interpret these data to indicate that MFGE8 modulates CES enzyme gene transcription by regulating HNF4γ protein levels.

### ***HNF4γ regulates catabolism of enterocyte cLDs***

To investigate the functional role of HNF4γ in enterocyte LD homeostasis, we challenged WT and *Hnf4γ* KO mice with olive oil gavage (Figure 3A) and evaluated jejunal enterocyte TG hydrolase activity, small intestinal TG content, and serum TG levels. *Hnf4γ* KO enterocytes had significantly reduced TG hydrolase activity at baseline and 2 hours after olive oil gavage (Figure 3B). At 2 hours after the gavage, the increase in hydrolase activity associated with greater small intestinal TG content versus lower serum TG levels (figure 3C-E). We next administered 3H-labeled oleic acid by gavage to WT and *Hnf4γ* KO mice in the presence of the lipoprotein inhibitor tyloxapol (to prevent catabolism of serum TG) and measured the radioactive signal in the intestine and in the serum 2 hours later (Figure 3F-H). *Hnf4γ* KO mice had greater small intestinal radioisotope accumulation and reduced serum radiolabel (Figure 3G-H). The *Hnf4γ* KO mice were then fed a high-fat diet (HFD) or a control diet for 3 weeks. After a 12 hour fast, the *Hnf4γ* KO mice fed HFD had greater intestinal and lower

serum TG content as compared with WT mice on a normal chow diet (Figure 3I,J). Of note, *Hnf4y* KO mice exposed to acute or chronic fat challenges phenocopied our previous findings with *Mfge8* KO mice (11) supporting the role of HNF4 $\gamma$  in catabolism of intestinal LDs (11).

### ***CES1D* regulates hydrolysis of enterocyte cLDs**

We were next interested in understanding whether reduced expression of CES enzymes lead to impaired TG hydrolase activity in *Mfge8* KO and *Hnf4y* KO enterocytes. The human genome contains 6 CES genes (*CES1*, *CES2*, *CES3*, *CES4A*, *CES5A*, and *CES1P1*). The mouse genome contains a larger number of CES proteins (20 have been annotated) due to tandem gene duplication (16). Of these, CES1d, CES1f, CES1g, CES2a, CES2b, CES2c and CES2e have known TG hydrolase activity (16-18). Expression of CES2 in the human intestine is well documented (19, 20). To delineate whether CES1 protein is expressed in human intestine, we performed Western blot of human small bowel epithelial cell lysates prepared from intestinal resections of patients with inflammatory bowel disease. Both CES1 and CES2 were expressed in these lysates (Figure 4A). Caco-2 cell lysates, a human colon carcinoma cell line known to express high levels of CES1 and low level of CES2 protein (21), were used as a positive control for these Western blots.

We focused on CES1D since its expression (Figure 1C, 2B) and activity (Figure 1E, 2D) were significantly decreased in *Mfge8* and *Hnf4y* KO enterocytes and because it is the murine ortholog of human CES1 (16). CES1D protein levels by Western blot were markedly reduced in *Hnf4y* KO enterocytes (Figure 4B-C). We next analyzed data from recently published work looking at transcriptional targets of HNF4 $\gamma$  utilizing ChIP-sequencing in mouse enterocytes (16) and identified transcriptional binding sites for HNF4 $\gamma$  in the enhancer regions of *Ces1d* (Figure 4D). We next used an adenoviral vector to express exogenous Hnf4 $\gamma$  for 24 hours in *Hnf4y* KO intestines ex-vivo and subsequently probed by Western blot for HNF4 $\gamma$  and CES1D protein expression. Forced expression of HNF4 $\gamma$  in *Hnf4y* KO enterocytes rescued CES1D protein levels (Figure 4E).

We then evaluated enterocyte LD homeostasis in *Ces1d* KO mice. Global *Ces1d* KO mice had reduced enterocyte TG hydrolase activity at baseline and after olive oil gavage (Figure 4F), which coupled with increased intestinal TG content (Figure 4G, H) and reduced serum TG levels (Figure 4I). Enterocyte-specific deletion of *Ces1d* (*Ces1d* int-KO using villin-Cre transgene) had significantly reduced enterocyte TG hydrolase activity at baseline and after olive oil gavage (Figure 4J) which associated with increased enterocyte TG content and reduced serum TG levels 2 hours after olive oil gavage (Figure 4K, L). Oral gavage of 3H-labeled oleic acid to *Ces1d* int-KO mice increased intestinal radioactivity (Figure 4M) and reduced it in serum as compared to controls (Figure 4N). Together, these data indicate that mice with global or intestine specific *Ces1d* deletion phenocopy *Mfge8* KO (11) and *Hnf4y* KO mice in their response to olive oil gavage (Figure 3) in their impact on intestinal and serum lipids.

We have previously shown that *Mfge8* KO mice accumulate lipids in the cytosolic fraction after olive oil gavage consistent with altered cLD homeostasis (11). We therefore evaluated the intracellular location of accumulated TG in *Ces1d* int-KO mice 2 hours after 3H-labeled oleic acid gavage by fractionating jejunal enterocytes into cytosolic and microsomal components and measuring the radiolabel signal in each fraction. As with *Mfge8* KO mice (11), *Ces1d* int-KO mice accumulated radiolabel in the cytosolic fraction as compared with WT controls with no apparent differences in the microsomal fraction (Figure 4O-Q). We confirmed the relative enrichment of cytosolic and microsomal fractions by western blotting for cytosolic marker protein GAPDH and microsomal marker protein BIP (Supplementary Figure 2).

### ***MFGE8* regulates TG hydrolase activity through *CES1D***

To determine if MFGE8 and the  $\alpha\beta5$  integrin modulate CES1D protein levels we performed Western blot in *Mfge8* and  $\beta5$  KO enterocytes and found marked reduction of CES1D in both populations (Figure 5A-D). To directly assess whether the effect of MFGE8 on cLD catabolism is mediated through CES1D, we evaluated the

ability of rMFGE8 to increase TG hydrolase activity in *Ces1d* KO enterocytes. While rMFGE8 significantly increased TG hydrolase activity in WT and *Mfge8* KO enterocytes, it had no effect in *Ces1d* KO enterocytes (Figure 5E). We used a mutated *Mfge8* protein construct (RGE) that cannot bind integrins (10) as a negative control (Figure 5E). We next assessed whether transgenic re-expression of MFGE8 specifically in enterocytes in *Mfge8* KO mice using a tetracycline-inducible system (22) modulated CES1D protein levels. Inducible expression of MFGE8 rescued the loss of CES1D protein levels (Figure 5F-G) as well as the TG hydrolase activity (Figure 5H). We then assessed cLD catabolism in mice with global deletion of both *Ces1d* and *Mfge8* (*Ces1d/Mfge8* KO). We administered 3H-labeled oleic acid by gavage to WT, *Ces1d* KO, *Mfge8* KO, and *Ces1d/Mfge8* KO mice and quantified 3H radiolabel in the small intestine and serum 2 hours after gavage (Figure 5I-J). *Ces1d/Mfge8* KO mice had a similar increase in intestinal radiolabel and a similar reduction in serum radiolabel as *Mfge8* and *Ces1d* KO mice indicating the loss of both alleles had no additive effect (Figure 5I-J). Together, these data indicate that MFGE8 modulates enterocyte TG hydrolase activity in large part through CES1D.

### **MFGE8 links fatty acid absorption to LD catabolism through HNF4 $\gamma$**

We have previously shown that MFGE8 promotes absorption of dietary fatty acids in the small intestine. HNF4 $\gamma$  is a nuclear hormone receptor that constitutively binds saturated and cis-monounsaturated fatty acids of 14-18 carbons (23). We therefore examined whether MFGE8-mediated fatty acid absorption impacts the activity of HNF4 $\gamma$ . In our 3' Tag RNA seq data (Accession no. GSE200320) we found in *Mfge8* KO enterocytes decreased expression of *Cd36* and *Fatp2* (Figure 6A), two fatty acid transporters active in the intestine (24-27). We therefore assessed whether genetic deletion of *Cd36* impacts HNF4 $\gamma$  and observed a marked reduction in HNF4 $\gamma$  protein level in *Cd36* KO enterocytes (Figure 6B,C). Moreover, genetic deletion of *Cd36* also caused a reduction in CES1D protein level in enterocytes (Figure 6B,C).

We next performed 3'Tag-RNA seq of WT and *Cd36* KO small intestine (Figure 6D). Ingenuity pathway analyses of differentially expressed genes indicated enrichment of triglyceride degradation processes (Figure 6E). Furthermore, TG hydrolase activity was significantly decreased in *Cd36* KO enterocytes at baseline and after acute fat challenge (Figure 6F). Pharmacological blockade of FATP2 in WT mice also suppressed enterocyte TG hydrolase activity after acute fat challenge (Figure 6F). Both *Cd36* KO mice and WT mice treated with a pharmacological inhibitor of FATP2 accumulated lipids in the small intestine and had lower TG level after an acute fat challenge as compared with WT controls (Figure 6 G,H). To further assess whether the effect of MFGE8 on LD catabolism involves CD36, we evaluated the ability of rMFGE8 to increase TG hydrolase activity in *Cd36* KO enterocytes. While rMFGE8 significantly increased TG hydrolase activity in WT enterocytes, it had no effect in *Cd36* KO enterocytes (figure 6I). These data suggest that the effects of MFGE8 on enterocyte HNF4 $\gamma$  protein levels and LD catabolism are linked through MFGE8/CD36 dependent fatty acid absorption.

### **Fatty acid stabilizes HNF4 $\gamma$ protein to activate transcription of *Ces* genes**

We next assessed whether oleic acid activates HNF4 $\gamma$ -mediated transcription of *Ces* genes associated with lipid catabolism. We cloned the 500-bp region of the putative enhancer regions of *Ces1d* into a luciferase vector and performed a dual luciferase activity assay in control and HEK293 cells overexpressing HNF4 $\gamma$  (via adenovirus) in presence and absence of oleic acid (Figure 7A). Cells with HNF4 $\gamma$  overexpression had significantly increased luciferase activity for *Ces1d*. Interestingly, oleic acid further induced transcription of *Ces1d* (Figure 7B). We next performed a 24-hour cycloheximide pulse-chase experiment in HEK293 cells in which we overexpressed HNF4 $\gamma$  by adenovirus, and subsequently incubated cells with oleic acid (Figure 7C). HNF4 $\gamma$  protein levels decreased at the 12-hour time point in presence of cycloheximide but addition of oleic acid prevented this decay (Figure 7D-E). We interpret these data to indicate that oleic acid induces *Ces1d* transcription by stabilizing enterocyte HNF4 $\gamma$  protein levels. We then determined whether a chronic HFD impacts expression of HNF4 $\gamma$  and CES1D in vivo. After 3 weeks on HFD, small intestinal protein levels of HNF4 $\gamma$  and CES1D were increased in mice on HFD as

compared with normal chow diet (Figure 7F-G). We interpret these data to indicate that stabilization of HNF4y protein levels by dietary fatty acids drives the increase in CES1D expression.

### ***The effect of MFGE8 of cLD catabolism is unique to diet-derived cLDs***

To determine whether MFGE8 modulates cLDs derived from the basolateral circulation and not from luminal fat absorption we administered <sup>3</sup>H-oleic acid IP to *Mfge8* KO and WT mice and quantified the radioactive signal in the small intestine. Interestingly, we did not observe differences when comparing *Mfge8* KO and WT samples (Supplementary Figure 3A). Furthermore, when we performed cell fractionation and measured the radioactive signal in cytosolic and microsomal fractions, we found no significant differences between *Mfge8* KO and WT samples. (Supplementary Figure 3B-D). These data support the interpretation that the effect of MFGE8 on cLD hydrolysis is restricted to diet-derived cLDs.

### ***β5 blockade impairs hydrolysis of enterocyte cLDs***

Finally, we determined the therapeutic potential of β5 integrin blockade on dampening postprandial lipemia. IP β5 blockade reduced TG hydrolase activity and increased small intestine lipid accumulation after an acute olive oil gavage as compared with isotype control antibody in WT mice (Figure 8A-B).

## **Discussion**

Enterocytes are unique in that they are polarized cells that absorb fatty acids from 2 distinct cellular pools: circulating fatty acids from the basolateral surface and dietary fatty acids from the apical surface. Absorbed fatty acids can be catabolized through beta-oxidation, packaged into chylomicrons for delivery through the circulation to peripheral organs, or retained in the enterocyte as part of cLDs. Storage of fatty acids in cLDs modulates the risk of developing atherosclerotic disease by minimizing the extent of postprandial lipemia, particularly in the setting of a fat-rich diet. The importance of this regulatory mechanism is evident when one considers that humans with obesity and/or diabetes characteristically have exaggerated postprandial lipemia (28, 29) coupled with a marked increase in the risk of developing coronary artery disease. Of note, oxidation of chylomicron remnants is particularly pro-atherogenic (30, 31) providing a rationale for why serum lipid levels after a meal have a stronger correlation with coronary artery disease than fasting serum lipid levels (2).

Enterocytes have 2 distinct pools of cLDs; those derived from lipids from the circulation and those from lipids absorbed from the diet (5, 32). CLDs derived from the circulation are thought to be primarily utilized for phospholipid synthesis or beta-oxidation while those from the diet are thought to be primarily incorporated into TGs used for chylomicron production (5, 32). Catabolism of each cLD pool occurs through distinct molecular pathways with hydrolysis of enterocyte cLDs derived from the circulation occurring by the same molecular pathways utilized by adipocytes and centered on the ATGL/CGI-58 (7-9, 33).

We have previously shown that MFGE8 links the absorption of dietary fats with mobilization of fatty acids from cLDs for chylomicron production through ligation of αv integrins (10, 11). We were therefore interested in understanding which TG hydrolases function downstream of the MFGE8-integrin pathway. Our findings that recombinant MFGE8 significantly increased enterocyte TG hydrolase activity in *Atgl* KO enterocytes indicated that the effect of the MFGE8-integrin axis on cLDs occurs through an unidentified TG hydrolase. Using an unbiased approach, we found differential expression of the CES enzyme family of hydrolases in *Mfge8* KO enterocytes and subsequently show that one member, CES1D, mediates the bulk of effect of the MFGE8-integrin axis on enterocyte CLD homeostasis.

Of note, while the human genome contains 6 CES genes (*CES1*, *CES2*, *CES3*, *CES4A*, *CES5A*, and *CES1P1*), tandem gene duplication has led to 20 annotated *Ces* enzymes in the mouse genome (16). The *CES1* family in mice consists of 8 members, 3 of which had decreased expression in *Mfge8* KO enterocytes

(*Ces1d-f*). We chose to focus on CES1D because it is the closest murine ortholog of human *CES1*. Whether CES1D mediates the entirety of the effect of MFGE8 on enterocyte TG hydrolase activity is difficult to ascertain given the number of CES genes that have altered expression or activity in *Mfge8* KO enterocytes. However, it is clear from the work presented here that CES1D mediates the majority, if not all, of the effects of MFGE8 on enterocyte TG hydrolysis given how closely the *Ces1d* KO mice phenocopy *Mfge8* KO mice in their response to acute and chronic fat challenges, the failure of recombinant MFGE8 to increase TG hydrolase activity in *Ces1d* KO enterocytes, and the lack of additive effects on enterocyte TG content and serum TG levels after olive oil gavage in mice double KO for *Mfge8* and *Ces1d* (as compared with single KO mice).

One potential limitation is that genetic deletion of *Ces1d* altered expression of other *Ces* enzymes, which could have contributed to the observed physiological effects. Our study focused on CES1D, as the closest murine ortholog of the human hydrolase CES1 and as an enzyme shown to express and have high activity in the proximal intestine (34) where most chylomicron generation is known to occur. A profiling of the enzymatic activity of hydrolases in the murine small intestine identified multiple CES enzymes, including CES1D, and highlighted the need to understand the function and regulation of the various intestinal hydrolases. Our data suggest that CES1D might be a rate-limiting enzyme in catabolism of LDs from dietary lipids, such that its deletion could impact the overall pathway, despite potential involvement of other CES enzymes. Of note, increased transcription of *Ces* enzymes in the intestine of mice with enterocyte-specific deletion of ATGL and CGI-58 has been reported (9) suggesting that some *Ces* enzymes might compensate for loss of the canonical pathway for hydrolysis of LDs derived from the circulation.

The effect of the *Mfge8*-integrin pathway being restricted to diet-derived cLDs is consistent with our published work showing no differences in TG hydrolase activity in the liver or white adipose tissue of *Mfge8* KO mice (11). We conclude from the work presented here that the CES family of enzymes, in particular CES1D, mediate the effect of MFGE8 on diet-derived LDs based on several observations. First, recombinant MFGE8 retains the ability to increase enterocyte TG hydrolysis in enterocytes KO for *Atgl*, the enzyme that regulates catabolism of LDs derived from the basolateral circulation (9). Second, gavage of radiolabeled oleic acid in the setting of pretreatment (for the *Ces1d* KO and *HNF $\gamma$*  KO studies) with the lipoprotein lipase inhibitor Tyloxapol (which prevents breakdown of serum TG that is a prerequisite for absorption of fatty acids from the basolateral circulation) leads to accumulation of radiolabel in cLDs in the small intestine of *Mfge8* KO (11), *Ces1d* KO, and *HNF $\gamma$*  KO mice. However, IP administration of 3H-oleic acid to *Mfge8* KO and WT mice leads to similar small intestine total, cytosomal, and microsomal fraction radioactive signals arguing against an effect of MFGE8 on absorption of fatty acids from the basolateral surface and accumulation of basolateral-derived LDs (that are present in the cytosolic fraction).

Our previous work identifies a biological program linking absorption of dietary fat with mobilization of fat stored in enterocyte LDs for chylomicron production through MFGE8 (9-11). Here, we further delineate the molecular mechanisms coupling these two processes by showing that a dietary fatty acid (oleic acid), absorbed in part through MFGE8-dependent mechanisms, stabilizes protein levels and transcriptional activity of a nuclear hormone receptor, HNF $\gamma$ , which then increases enterocyte CES enzyme expression and cLD hydrolysis. Both members of the HNF family of transcription factors, HNF $\alpha$  and HNF $\gamma$ , have been shown to constitutively bind fatty acids (23). HNF $\gamma$  expression is predominately restricted to the small intestine (15). To explore the hypothesis that fatty acid uptake is an important step in MFGE8-induced increases in CES expression/activity, we focused on CD36, a fatty acid transporter with a well-established role in absorption of fatty acids in the proximal intestine (35). Furthermore, we had previously shown that in adipocytes and hepatocytes, MFGE8 induces cell surface translocation of CD36 leading to enhanced fatty acid uptake (10). Interestingly, here we found markedly decreased expression of Cd36 in *Mfge8* KO enterocytes. Furthermore, *Cd36* KO enterocytes phenocopied *Mfge8* KO enterocytes with respect to HNF $\gamma$  and CES1D protein expression, TG hydrolase activity, and differential gene expression profiles in enterocytes. Additionally, recombinant MFGE8 failed to increase TG hydrolase activity in *Cd36* KO enterocytes.

These data suggesting that fatty acid uptake regulates HNF $\gamma$ -dependent transcription were further supported by showing positive regulation by oleic acid of HNF $\gamma$ -dependent CES transcription and HNF $\gamma$  protein levels. In sum, these data indicate to us that MFGE8-CD36 dependent uptake of dietary fats promotes enterocyte TG hydrolase activity by stabilizing HNF $\gamma$ -leading to increased HNF $\gamma$ -dependent transcription of CES enzymes. Our findings generate new questions related to the specific diet-derived fatty acids and/or metabolites that serve as HNF4 $\gamma$  ligand, whether these fatty acids replace the constitutively bound fatty acid in HNF $\gamma$  and how this interplay regulates the transcriptional activity of HNF4 $\gamma$ .

The MFGE8-integrin pathway has emerged as an interesting candidate for therapeutic targeting in metabolism. We have previously shown that MFGE8 promotes the development of obesity both through a direct effect on intestinal fat absorption (10) and by reducing gastrointestinal motility thereby allowing more time for nutrient absorption (22). Furthermore, these effects can be therapeutically targeted independent of each other given that they are mediated by different integrin receptors ( $\alpha$ v $\beta$ 5 for fat absorption and  $\alpha$ 8 $\beta$ 1 for motility effects). More recently, we have shown that MFGE8 ligation of  $\alpha$ v $\beta$ 5 induces insulin resistance at the level of the insulin receptor and that blockade of this pathway leads to enhanced insulin sensitivity in the skeletal muscle and liver (36). Our work here identifies a carboxylesterase enzyme that is responsible for the effect of MFGE8 on catabolism of diet-derived cLDs. This pathway can be targeted to reduce the severity of postprandial lipemia in obese, insulin-resistant patients while concurrently reducing fat absorption (10) and enhancing peripheral tissue insulin sensitivity (36). Whether these benefits would outweigh the potential risks of targeting this biological pathway remains to be determined.

## Materials and methods

### Mice

All animal experiments were approved by the UCSF Institutional Animal Care and Use Committee in adherence to NIH guidelines and policies. *Mfge8* KO mice were purchased from RIKEN and are in the C57BL/6 background and have been extensively characterized. *Ces1d* KO and *Ces1d* flox/flox have been previously characterized (37-39). *Villin-Cre* transgenic mice [Tg (Vil1 Cre) 997Gum] (Jackson laboratories) were bred with *Ces1d* flox/flox mice to generate intestine-specific *Ces1d* KO (*Ces1d* int-KO) mice (*Ces1d* flox/flox Vil Cre+). *Ces1d* flox/flox Vil Cre negative mice were used as control. *Hnf4a* flox/flox Vil Cre ert2 / *Hnf4 $\gamma$ <sup>Crispr</sup>* mice are in a mixed background and have been characterized (15). We described *Hnf4a* flox/flox Vil Cre ert2 *Hnf4 $\gamma$ <sup>Crispr</sup>* mice as *Hnf4 $\gamma$*  KO for our experiments. *Hnf4a* flox/flox Vil Cre ert2 *Hnf4 $\gamma$ <sup>+/+</sup>* mice were used as controls. Tg(TetO-Mfge8) transgenic mice containing the tetracycline-inducible *Mfge8* construct were crossed with a *Mfge8* KO mice line created using a gene disruption vector (40) and mice carrying the Tg(Vil-rtTA) transgene. *Cd36* KO mice has been extensively characterized (41).

### Isolation of primary enterocytes

Primary enterocytes were harvested from intestinal jejunal segments following previously published protocol (11). The jejunal lumen was washed with buffer A (115 mM NaCl, 5.4 mM KCl, 0.96 mM NaH<sub>2</sub>PO<sub>4</sub>, 26.19 mM NaHCO<sub>3</sub>, and 5.5 mM glucose buffer at pH 7.4, gassed for 30 minutes with 95% O<sub>2</sub> and 5% CO<sub>2</sub>) and subsequently filled with buffer B (67.5 mM NaCl, 1.5 mM KCl, 0.96 mM NaH<sub>2</sub>PO<sub>4</sub>, 26.19 mM NaHCO<sub>3</sub>, 27 mM sodium citrate, and 5.5 mM glucose at pH 7.4, saturated with 95% O<sub>2</sub> and 5% CO<sub>2</sub>) and incubated in buffer B for 15 minutes at 37 with constant shaking. After 15 minutes, the solution was discarded and the jejunal segments were transferred to a new 100 mm dish and filled with and incubated in buffer C (115 mM NaCl, 5.4 mM KCl, 0.96 mM NaH<sub>2</sub>PO<sub>4</sub>, 26.19 mM NaHCO<sub>3</sub>, 1.5 mM EDTA, 0.5 mM dithiothreitol, and 5.5 mM glucose at pH 7.4, saturated with 95% O<sub>2</sub> and 5% CO<sub>2</sub>) for 15 minutes at 37 with constant shaking after which the luminal contents were centrifuged and the pellet containing the epithelial cells used for subsequent experiments. The



purity of the isolation was checked by FACS sorting cells using anti-Epcam antibody. Epcam-positive cells constituted 85-90% of the isolated cell pellet.

### **Recombinant MFGE8 (rMFGE8)**

rMFGE8 and RGE constructs consisted of murine cDNA of *Mfge8* (long isoform) fused with the human FC domain. They were expressed in High Five cells and affinity purified as previously described (10, 36). The RGE construct contains a point mutation that changes the integrin-binding RGD sequence to RGE. Primary enterocytes were treated with either RGE or rMFGE8 (10 mg/ml) for 1 hour and then washed in PBS and processed for TG hydrolase activity assay.

### **TG hydrolase (TGH) activity assay**

TG hydrolase activity from jejunal enterocytes was measured using previously a published protocol (11). Protein was extracted from primary enterocytes in 100 mM potassium phosphate buffer by brief sonication. For Figure 5A, primary enterocytes were incubated with rMFGE8 or RGE proteins (10 µg/mL) in serum-free media for 1 hour before proceeding with protein isolation. 60-100 µg protein was incubated with 100 µl TG substrate (25 nmol triolein/assay and 40,000 cpm/nmol <sup>14</sup>C-triolein; PerkinElmer) and 35.5 µg mixed micelles of phosphatidylcholine and phosphatidylinositol (3:1, w/w), respectively, for 1 hour at 37. After 1 hour, the reaction was terminated by adding 3.25 ml methanol/chloroform/heptane (10:9:7, v/v/v) and 1 ml 100 mM potassium carbonate (pH 10.5 with boric acid). After centrifugation (800×g, 15 minutes, 4°C), radioactivity was measured in 1 ml of the upper phase by liquid scintillation counting. The radioactivity counts were normalized relative to protein concentration and the TG hydrolase activity was expressed as relative fold changes to the untreated control samples.

### **RNA isolation**

RNA from primary enterocytes was isolated using Qiagen RNeasy plus micro kit. RNA from small intestinal tissues was isolated using Qiagen RNeasy lipid tissue mini kit.

### **3' Tag RNA sequencing**

Gene expression profiling of primary enterocyte RNA samples and total intestinal RNA samples were carried out using a 3'-Tag-RNA-Seq protocol. Barcoded sequencing libraries were prepared using the QuantSeq FWD kit (Lexogen, Vienna, Austria) for multiplexed sequencing according to the recommendations of the manufacturer using the UDI-adaptor and UMI Second-Strand Synthesis modules (Lexogen). High integrity total RNA samples were processed according to the QuantSeq default protocol. The fragment size distribution of the libraries was verified via micro-capillary gel electrophoresis on a LabChip GX system (PerkinElmer, Waltham, MA). The libraries were quantified by fluorometry on a Qubit fluorometer (Life Technologies, Carlsbad, CA), and pooled in equimolar ratios. The library pool was Exonuclease VII (NEB, Ipswich, MA) treated, SPRI-bead purified with KapaPure beads (Kapa Biosystems / Roche, Basel, Switzerland), quantified via qPCR with a Kapa Library Quant kit (Kapa Biosystems) on a QuantStudio 5 RT-PCR system (Applied Biosystems, Foster City, CA). Up to 48 libraries were sequenced per lane on a HiSeq 4000 sequencer (Illumina, San Diego, CA) with single-end 100 bp reads.

### **Bioinformatic analysis**

FASTQ files were trimmed with Trimmomatic v0.38.1 (<https://github.com/usadellab/Trimmomatic>) and umi-tools (<https://github.com/CGATOxford/UMI-tools>) in order to remove low quality reads and any adapter contamination. The reads were mapped with HISAT2 v2.1.0 to the mouse genome (mm10 / GRCm38). After mapping, all BAM files were used as input for HTSeq-count v0.9.1 to calculate transcript coverage. DESeq2 (v2.11.40) (42) was used to find differentially expressed transcripts between samples for each sequencing depth. Differentially expressed genes (DEG) were determined based on whether the adjusted FDR was  $\leq 0.05$  and if a log<sub>2</sub> fold-change of 0.5 or greater was observed. Data are deposited in the NCBI Gene Expression Omnibus (GEO) database under Accession no. GSE200320. Heatmaps (all significantly altered genes with FDR<0.05) were built using with GENE-E v3.0.215. In order to do pathway enrichment analysis, Ingenuity

Pathways Analysis (IPA) (43) was used focusing on differentially expressed genes with an FDR of  $< 0.05$ . As determined from the DESeq2 differential gene expression analysis above. In order to predict transcription factors that regulate Ces family genes, iRegulon V1.3 (44) was run on the cytoscape 3.8.0 platform (45).

### **Serine Hydrolase Probe MS Experiments**

For serine hydrolase probe MS experiments (13) primary enterocytes were isolated from 5 mice to prepare a single sample (N=1) and pooled cells together to extract protein by sonication in PBS. Protein concentrations were measured by micro BCA or Bradford assay. 300-400  $\mu\text{g}$  of protein at a concentration of 1 mg/ml was incubated with either Fluorophosphonate-biotin probe (final concentration of 5 $\mu\text{M}$ ) or equivalent amount of DMSO (as negative control) for 60 minutes at 37°C. Excess probe was removed and protein precipitated with chloroform/methanol extraction by adding 2 volumes of methanol, 0.5 volume of chloroform and 1 volume of H<sub>2</sub>O and subsequently vortexed and centrifuged at 14,000 rpm for 5 minutes. The top layer was discarded and the protein layer collected from tube bottom. 2 volumes of methanol were added to the protein and stored it in -80°C overnight. The following day, the protein pellet was centrifuged, excess methanol removed and the protein pellet air dried for 15 minutes. The protein pellet was resuspended in freshly prepared 500 $\mu\text{l}$  6M urea in 25 mM ammonium bicarbonate followed by the addition of 2.5  $\mu\text{l}$  1mM DTT and incubation at 65°C for 15 minutes. After cooling, 20 $\mu\text{l}$  0.5M iodoacetamide was added to the protein which was then incubated at room temperature for 30 minutes to alkylate free cysteines. 70  $\mu\text{l}$  of 10% SDS was added and heated for 5 minutes at 65°C. Samples were diluted with 3 ml PBS and incubated with 50  $\mu\text{l}$  streptavidin-agarose beads at room temperature for 2-3 hours on a shaker. Beads were precipitated by centrifuging at 2500Xg for 2 minutes, washed, and resuspended in 250  $\mu\text{l}$  25 mM ammonium bicarbonate. 1  $\mu\text{g}$  trypsin was added per sample and incubated overnight on a shaker at 37°C. Samples were then centrifuged and the supernatant containing peptides was collected followed by peptide desalting through C18 columns. Peptides were quantified and 200ng of sample loaded onto instrument for LC-MS analysis.

### **Mass Spectrometry Analysis**

A nanoElute was attached in line to a timsTOF Pro equipped with a CaptiveSpray Source (Bruker, Hamburg, Germany). Chromatography was conducted at 40°C through a 25cm reversed-phase C18 column (PepSep) at a constant flowrate of 0.5  $\mu\text{L}/\text{min}$ . Mobile phase A was 98/2/0.1% Water/MeCN/Formic Acid (v/v/v) and phase B was MeCN with 0.1% Formic Acid (v/v). During a 108 min method, peptides were separated by a 3-step linear gradient (5% to 30% B over 90 min, 30% to 35% B over 10 min, 35% to 95% B over 4 min) followed by a 4 min isocratic flush at 95% for 4 min before washing and a return to low organic conditions. Experiments were run as data-dependent acquisitions with ion mobility activated in PASEF mode. MS and MS/MS spectra were collected with m/z 100 to 1700 and ions with z = +1 were excluded.

Raw data files were searched using PEAKS Online Xpro 1.6 (Bioinformatics Solutions Inc., Waterloo, Ontario, Canada). The precursor mass error tolerance and fragment mass error tolerance were set to 20 ppm and 0.03 respectively. The trypsin digest mode was set to semi-specific and missed cleavages was set to 2. mouse Swiss-Prot reviewed (canonical) database (downloaded from UniProt) and the common repository of adventitious proteins (cRAP, downloaded from The Global Proteome Machine Organization) totaling 20,487 entries were used. Carbamidomethylation was selected as a fixed modification. Oxidation (M) was selected as a variable modification.

Experiments were performed in biological triplicate. Resulting combined datasets were subjected to the following filtration criteria:

1. Database Search ( $-10\log(\text{p-value}) \geq 20$ , 1% peptide and protein FDR).
2. cross-reference with a serine hydrolase proteome dataset.
3. Generate ratio of Probe/No Probe. Require  $\geq 2$  Unique Peptides and  $\geq 3$  peptides total with probe treatment

4. Proteins determined to be probe enriched were 3-fold more detected in Probe-treated sample compared to No Probe (ratio of  $\geq 3$ )

Data is available via the UCSD Mass Spectrometry Interactive Virtual Environment, a full member of the Proteome Exchange consortium, under the dataset number (Accession no. MSV000089304).

### **Protein isolation and western blot**

Primary enterocytes were centrifuged in PBS and the cell pellet was incubated with protein lysis buffer (20mM Tris-HCl pH8.0, 137mM NaCl, 1% Nonidet P-40 (NP-40) and 2mM EDTA) overnight in  $-80^{\circ}\text{C}$  before protein isolation was carried out by repeated cycles of freezing and thawing. To isolate protein from tissue samples, a TissueLyser (Qiagen) was used to homogenize the tissue samples in lysis buffer. Lysates were then centrifuged at  $13,000\times g$  for 10 minutes at  $4^{\circ}\text{C}$  to pellet debris and supernatants were stored in  $-80^{\circ}\text{C}$  for future use. Protein concentration was measured by Bradford assay, followed by western blotting using standard procedure. 10-20  $\mu\text{g}$  protein samples in SDS-PAGE were resolved in 7.5% - 10% gels (Bio-Rad) and transblotted onto polyvinylidene fluoride membranes (Millipore). Membranes were blocked with 5% BSA-PBST for 1 hour and then incubated with primary antibody (listed in supplementary table 1) overnight at  $4^{\circ}\text{C}$ . Membranes were then washed in 0.15% PBST 3-5 times at 5 minutes per wash before incubation with HRP-conjugated secondary antibodies for 1 hour. Membranes were washed 3-5 times in 0.15% TBST. Immunoreactive bands were generated using an Immobilon Western chemiluminescence HRP-conjugated substrate (Amersham) and developed either on a film (Kodak) or imaged in a ChemiDoc. For figure 2D, Li-Cor secondary antibodies were used to generate bands and imaged in Li-Cor Odyssey. Membranes were subsequently deprobed using Restore western blot stripping buffer (Thermo scientific) and re-probed using other primary antibodies

### **Immunofluorescence staining**

Mice jejunal tissues were fixed in 4% Z-fix overnight followed by cryopreservation in 15% and then 30% sucrose in PBS. Tissues were then embedded in OCT medium and cryo-sectioned ( $30\ \mu\text{m}$ ) on frost-free slides using a cryo-stat. Coverslips/ slides were then washed with PBST (0.5% Tween or Triton-X-100) and incubated in blocking buffer (PBST, 1% bovine serum albumin and 5% donkey serum) for 1 hour. Tissue sections were incubated overnight with the primary antibody against Epcam (primary antibodies and their dilutions are listed in supplementary table 1) in blocking buffer at  $4^{\circ}\text{C}$ . On the following day, tissue sections were washed with PBST 3 times and then incubated with the secondary antibodies (donkey anti rat Alexafluor in 1:100 dilution) for 1 hour, washed, stained with Bodipy 488 (2mg/ml) for 30 minutes followed by mounting in Vectashield (H-1400) DAPI. For staining for active hydrolases, the fixed tissues on slides were preincubated for 20 minutes with assay buffer (50 mM Tris-HCl, pH 7.4; 1 mM EDTA; 100 mM NaCl; 5 mM  $\text{MgCl}_2$  and 0.1% (w/v) BSA) followed by incubation for 60 min with TAMRA-FP in the assay buffer (0.5  $\mu\text{M}$  final concentration)(12). Slides were then washed 3 times in 0.1M phosphate buffer before mounting with DAPI. Images were captured in the confocal microscope Zeiss LSM 780-FLIM and processed in Image J.

### **Microsome isolation**

A microsome isolation kit (ThermoFisher Scientific) was used for separating cytosol and microsome from jejunal tissues following the manufacturer's protocol. Jejunal tissues from mice fed with radiolabeled oleic acid were resuspended in 200  $\mu\text{l}$  of olive oil. 50 mg tissue was homogenized in homogenizing buffer, incubated on ice for 1 hour and centrifuged at  $10,000g$  for 10 minutes to clear debris. The supernatant was centrifuged at  $20,000g$  for 20 minutes in the pellet containing the microsomes, washed and resuspended in resuspension buffer with the supernatant representing the cytosolic fraction. Radioactivity was measured in each of these fractions using liquid scintillation counting.

### **Human small intestine samples**

Human intestinal epithelial cells from small intestinal resection tissue samples from inflammatory bowel disease patients (46) were provided by Dr. Rieder, Cleveland Clinic Foundation, with appropriate IRB approval.

Intestinal tissue pieces were lysed using RIPA buffer followed by protein quantification by micro-BCA assay and 30 µg protein samples were loaded in 10% polyacrylamide gels for western blotting.

### **Acute fat challenge**

For acute fat challenge experiments, mice were fasted for 4 hours and then subjected to an oral gavage of olive oil (200 µl). Mice were euthanized 2 hours after the oil bolus and intestinal tissue pieces were collected for further experiments. Mice were treated IP with lipoprotein lipase inhibitor Tyloxapol (0.5 mg/g body weight of mice) 1 hour before the oral gavage (47). WT mice were treated with FATP2 blocker Grassofermata (Cayman chemicals, catalog no. 26202) by IP injection at a dose of 300mg/kg 2 hours prior to oral gavage (48). WT mice were injected IP with either β5 blocking antibody (5 mg/kg) or isotype control antibody 2 hours before acute fat challenge. Blood was drawn from mouse tail veins before and 2 hours after oil gavage.

### **<sup>3</sup>H oleic acid gavage**

4 hour-fasted mice were subjected to oral gavage with olive oil containing 5 µCi <sup>3</sup>H-labeled oleic acid. Mice were treated IP with lipoprotein lipase inhibitor Tyloxapol (0.5 mg/g body weight of mice) 1 hour before oral gavage. Prior to and 30, 60 and 120 minutes after olive oil/<sup>3</sup>H oleic acid administration, blood was collected from the tail vein. Mice were then euthanized and intestinal tissue pieces were procured and then freeze-dried in a tissue lyophilizer.

### **Chronic high-fat feeding**

8-week-old male mice were placed on high-fat diet (60%kcal% fat, Research Diet Inc, catalog no. d12492) for 3 weeks after which they were fasted for 12 hours before evaluation of the serum and intestinal TG content.

### **Serum and intestinal TG measurement**

Serum and intestinal TG content was measured using TG measurement kit (Cayman Chemical) following manufacturers' protocol. Blood was collected from mouse tail veins and serum isolated by centrifuging blood samples for 15 minutes at 2000×g. 5 µl serum were used to measure TG content. For measuring TG content in the intestinal samples, approximately 50 mg tissue were homogenized in lysis buffer (supplied with the kit) and used 10 µl of the tissue lysate to measure TG content. The total TG content were normalized to the weight of the tissue.

### **Ex-vivo overexpression of HNF4γ**

An adenoviral expression vector containing mouse *Hnf4γ* gene (pAV[EXP]-EGFP CMV>mHnf4g (NM\_013920.2), referred to here as AD-*Hnf4γ*-GFP) was obtained from Vector Biolabs. The intestinal lumen was flushed with PBS and pieces of small intestine from *Hnf4γ* KO mice were incubated with either blank adenoviral vector or *Hnf4γ*-OV for 24 hours in DMEM. Intestinal pieces were then washed with PBS and lysed for protein extraction and western blot.

### **Luciferase assay**

The 500-bp region of the putative promoter/enhancer regions of multiple *Ces1* and *Ces2* genes (corresponding to the ChIP-Seq peak, accession no. XXXX)(15) were subcloned into a luciferase vector with a minimal promoter (PGL4) and dual luciferase activity assay was performed in control and HNF4γ-overexpressed HEK293 cells in the presence and absence of oleic acid. HEK293 cells were plated on 96-well plates and infected with *Hnf4γ*-expressing adenovirus for 6 hours in serum-free media and then cells were incubated with complete media overnight. On the following day, *Hnf4γ*-adenovirus infected cells were transfected with 0.5 µg of reporter plasmid carrying the firefly luciferase gene under the control of *Ces* gene promoters containing the HNF4γ binding sequences in PGL-4 vector, and 0.5 µg of reference plasmid pRL-TK carrying the Renilla luciferase gene under the control of the simian virus 40 enhancer and promoter (Promega). Lipofectamine 3000 reagent (Invitrogen) was used as a transfection reagent following the manufacturer's protocol. After 24 hours, cells were treated with oleic acid (0.6 µM final concentration) for another 12 hours. Cells were lysed in 200 µl of passive lysis buffer (Promega). Firefly luciferase and Renilla luciferase activities were measured using Dual-Luciferase reporter

assay system (Promega) on a 96-well plate on a plate reader. Relative activity was defined as the ratio of firefly luciferase activity to Renilla luciferase activity.

### HNF4 $\gamma$ protein stability assay

HEK293 cells were infected with Hnf4 $\gamma$ -adenovirus for 6 hours in serum-free media and then the cells were incubated with complete media overnight. On the following day, the cells were first treated with cyclohexamide (100  $\mu$ g/ml) followed by treatment with oleic acid in fat-free BSA or BSA alone. Cells were then lysed 6, 12 and 24 hours after treatment. Protein samples were used to detect HNF4 $\gamma$  protein level by western blotting.

### Acknowledgement

This work was supported by awards from the NIH (HL136377-01 and DK110098) to K.A. R.D. was supported by the Larry L. Hillblom Foundation Fellowship Research Grant (2019-D-004-FEL). The sequencing was carried out at the UC Davis Genome Center DNA Technologies and Expression Analysis Core, supported by NIH Shared Instrumentation Grant 1S10OD010786-01. The graphical abstract was made using Biorender.com. We would like to thank S. Layer for ongoing inspiration.

### Competing interest

None.

### Figure legends

**Figure 1: MFGE8 regulates the expression and activity of CES proteins.** (A-C) 3' Tag RNA sequencing of WT and *Mfge8* KO mouse primary enterocytes. (A) Heat map of differentially expressed genes. (B) Ingenuity pathway analysis of differentially expressed genes showing enriched biological processes. (C) Heat map showing altered expression of the *Ces1* family genes. N=4 WT and 5 *Mfge8* KO 7-8 week-old male mice. (D) Confocal imaging of active serine hydrolases in small intestinal cryosections identified with a TAMRA-FP probe (red fluorescence) and counterstained with DAPI (blue). Representative image from 2 independent experiments, white bar = 30 $\mu$ M. (E) Serine hydrolase ABPP analysis showing differential activities of CES enzymes in WT and *Mfge8* KO primary enterocytes obtained from 8-9-week-old male mice. Each sample represents pooled enterocytes from 5 mice with LC/MS performed in technical duplicates.

**Figure 2: MFGE8 regulates the expression and activity of CES hydrolases through HNF4 $\gamma$ .** (A) Heat map of expression of candidate transcription factors identified through the iRegulon database in 3' Tag RNA seq data of WT enterocytes. (B) Analysis of previously published RNA sequencing data (Accession no. GSE 200320) from WT and *Hnf4 $\gamma$*  KO enterocytes showing differential expression of the *Ces* genes. (C) Confocal imaging of active serine hydrolases identified with TAMRA-FP probe (red fluorescence) and counterstained with DAPI (blue) in WT and *Mfge8* KO intestinal cross-sections. Nuclei were stained with DAPI (blue). Representative image from 2 independent experiments, white bar = 30 $\mu$ M. (D) Serine hydrolase ABPP analysis showing differential activities of CES enzymes between WT and *Hnf4 $\gamma$*  KO primary enterocytes. N=2 independent experiments with each sample representing pooled enterocytes from 5 mice (total 10 mice per group). A mix of 9-10 week old male and female mice were used for this experiment. (E-F) Representative western blot of HNF4 $\gamma$  protein levels in WT and *Mfge8* KO enterocytes from 8-10-week-old male and female mice. Experiments are performed 2 independent times with a total of 4 mice in each genotype. (F) Densitometric analysis of the western blots (including panel E). All data expressed as Mean  $\pm$  S.E.M. \*\**P* < 0.01. Data in panel F were analyzed by unpaired student's t-test.

**Figure 3: HNF4 $\gamma$  regulates catabolism of enterocyte cLDs.** (A) Schema of the experimental design for panels B-E. (B) TG hydrolase (TGH) activity, (C, D) proximal jejunal TG content, and (E) serum TG content at baseline and 2 hours after olive oil gavage in primary enterocytes from WT and *Hnf4 $\gamma$*  KO mice (N=3-6 for panels B, C, E). (D) Intestinal tissue sections were stained with Bodipy (green) and anti-Epcam antibody (Magenta, N=2 in each group). Results are from 2 independent experiments. (F) Schema of the experimental design for panels G and H. (G)  $^3\text{H}$  signal in the proximal jejunum 2 hours after oral administration of  $^3\text{H}$  Oleic acid in WT and *Hnf4 $\gamma$*  KO mice. (H)  $^3\text{H}$  signal in the serum over time after oral administration of  $^3\text{H}$  Oleic acid. N=4 mice per group from 2 independent experiments. A mix of 7-10-week-old male and female mice were used for these experiments. (I-J) Intestinal (I) and serum (J) TG content of 8-week-old WT and *Hnf4 $\gamma$*  KO mice after 3 weeks on a HFD or normal-chow diet and following a 12 hour fast. N=3-4, data expressed as mean  $\pm$  S.E.M. \* $P < 0.05$ , \*\* $P < 0.01$ , and \*\*\* $P < 0.001$ . Data in panels B, C, E, I and J analyzed by one-way ANOVA followed by Bonferroni's posttest. Data in panel G analyzed by student's t-test. Data in panel H were analyzed by 2-way ANOVA followed by Bonferroni's posttest.

**Figure 4: CES1D regulates hydrolysis of enterocyte cLDs.** (A) Western blot of CES1 and CES2 in small intestinal lysates from human patients with inflammatory bowel disease. Caco-2 lysates serve as a positive control for CES1 expression with GAPDH a loading control. N=3 independent patient samples. (B) Representative western blot of CES1D in WT and *Hnf4 $\gamma$*  KO enterocyte lysates from 2 independent experiments, N=3 mice total. (C) Densitometric analysis of the western blots of CES1D (including panel B). (D) Analysis of previously published ChIP sequencing data (Accession no. GSE 112946) showing binding sites for HNF4 $\gamma$  on the promoter/enhancer regions of *Ces* family genes. (E) Western blot showing HNF4 $\gamma$  and CES1D protein level in *Hnf4 $\gamma$*  KO mice intestine segments incubated with *Hnf4 $\gamma$*  expressing or control adenovirus (*Hnf4 $\gamma$ -AV*). Western blot is representative of 3 independent experiments with N=4 *Hnf4 $\gamma$*  KO mice in total per experimental group. (F) Enterocyte TG hydrolase activity, (G,H) proximal jejunal TG content, and (E) serum TG content at baseline and 2 hours after olive oil gavage in WT and *Ces1d* KO mice. (H) Intestinal tissue sections from the same group of mice were stained with Bodipy (green). N=3-5 mice in each group. Results are from 2 independent experiments. (J) TG hydrolase activity in primary enterocytes, (K) TG content (K) in the proximal jejunum and (L) TG content in the serum at baseline and 2 hours after olive oil gavage in WT and *Ces1d* i-KO mice. N=3-6 mice in each group. Data merged from 2 independent experiments. (M)  $^3\text{H}$  signal in the proximal jejunum 2 hours after oral administration of  $^3\text{H}$  Oleic acid. (N)  $^3\text{H}$  signal in the serum after oral administration of  $^3\text{H}$  Oleic acid over time in control and *Ces1d* int-KO mice. N=4-7 mice in each group. Results are from 2 independent experiments. (O-Q)  $^3\text{H}$  signal in the (O) cytosolic fraction, (P) microsomal fraction, and (Q) the ratio of cytosolic to microsomal radioactive signal in enterocytes from control and *Ces1d* int-KO mice 2 hours after oral gavage of  $^3\text{H}$ -labeled oleic acid. N=4-5 mice in each group. Data in panel F-G and panels I-L were analyzed by one-way ANOVA followed by Bonferroni's posttest. Data in panels C, M, and O-Q were analyzed by student's t-test. Data in panel N were analyzed by 2-way ANOVA followed by Bonferroni's posttest. All data expressed as Mean  $\pm$  S.E.M. \* $P < 0.05$ , \*\* $P < 0.01$ , and \*\*\* $P < 0.001$ .

**Figure 5: MFGE8 regulates TG hydrolase activity through CES1D.** (A-B) Representative western blot (A) showing CES1D protein level in WT and *Mfge8* KO primary enterocytes from 3 independent experiments. GAPDH was used as loading control. N=9 mice per group. (B) Densitometric analysis of the western blots (including panel A). (C) Representative western blot showing CES1D protein level in WT and  $\beta 5$  KO primary enterocytes from 2 independent experiments. HSP90 was used as loading control. N=5 WT and 4  $\beta 5$  KO mice in total. (D) Densitometric analysis of the western blots of CES1D protein (including panel C). (E) TG hydrolase activity in WT, *Ces1d* KO and *Mfge8* KO primary enterocytes 1 hour after incubation with rMFGE8 or RGE. N=5 independent experiments. (F) Western blot of CES1D and MFGE8 protein levels in enterocytes of *Mfge8* KO mice with transgenic inducible expression of MFGE8 in enterocytes (MFGE8 reexpressed, *Vil* rtTA+ TetO *Mfge8*+) and single transgenic, WT, and *Mfge8* KO enterocyte controls. GAPDH was used as loading control. (G) Densitometric analysis of the blot presented in panels F. (H) TG hydrolase activity in primary enterocytes isolated from the same groups of mice in panel E-F. N=3 mice in each group. (I-J)  $^3\text{H}$  signal in the

proximal jejunum (I) and serum (J) 2 hours after oral administration of  $^3\text{H}$  Oleic acid to WT, *Mfge8* KO, *Ces1d* KO and *Mfge8/Ces1d* double KO mice. N=3-4 mice in each group. All data expressed as Mean  $\pm$  S.E.M. \* $P < 0.05$ , \*\* $P < 0.01$ , and \*\*\* $P < 0.001$ . Data in panels B, D and G were analyzed by unpaired t-test. Data in panels E and H through J were analyzed by one-way ANOVA followed by Bonferroni's posttest.

**Figure 6: MFGE8 links fatty acid absorption to LD catabolism through HNF4 $\gamma$ .** (A) Heatmap showing differentially expressed fatty acid transporters in WT and *Mfge8* KO primary enterocytes from 3' Tag RNA sequencing (Accession: GSE 200320). (B-C) Western blot of HNF4 $\gamma$  and CES1D protein level in WT and *Cd36* KO primary enterocytes. N=3 mice in each group. (C) Densitometric analysis of the western blot in panel B. (D-E) Heatmap (D) and ingenuity pathway analysis (E) of differentially expressed genes in 3' Tag RNA sequencing of WT and *Cd36* KO intestine. (F-H) Primary enterocyte (F) TG hydrolase activity, (G) TG content in the proximal jejunum, and (H) serum TG content at baseline and 2 hours after acute fat challenge of WT, *Cd36* KO and WT mice treated with pharmacological inhibitor of FATP2 (FATP2 bi). (I) TG hydrolase activity in WT and *Cd36* KO primary enterocytes 1 hour after incubation with rMFGE8 or RGE. N=5 independent experiments. Data expressed as Mean  $\pm$  S.E.M. \* $P < 0.05$ , \*\* $P < 0.01$ , and \*\*\* $P < 0.001$ . Data in panels C were analyzed by unpaired t-test. Data in panels F through I were analyzed by one-way ANOVA followed by Bonferroni's posttest.

**Figure 7: Fatty acid stabilizes HNF4 $\gamma$  protein to activate transcription of *Ces* genes.** (A) Schematic representation of the method used for dual luciferase assay presented in panel B. (B) Data showing normalized luciferase activity of the *Ces1d* gene enhancer in the presence of oleic acid in HEK293 cells with adenoviral overexpression of Hnf4 $\gamma$ . Cells infected with a blank adenovirus (blank) used as a negative control. N=3 independent experiments. (C) Schematic representation of the method used for the cyclohexamide chase assay presented in panel D. (D) Representative western blot showing HNF4 $\gamma$  protein levels 6, 12 and 24 hours after treatment with oleic acid or DMSO control in the presence and absence of cyclohexamide in HEK 293 cells. Western blot is representative of 3 independent experiments. (E) Densitometric analysis of HNF4 $\gamma$  protein levels (including panel D). (F) Representative western blot showing HNF4 $\gamma$  and CES1D protein level in the small intestine of mice on a normal chow or high-fat chow diet. Results are from 2 independent experiments. (G) Densitometric analysis of the western blots of HNF4 $\gamma$  and CES1D (including panel F). N=2 mice per group per experiment (Total 4 mice in each group). All data expressed as Mean  $\pm$  S.E.M. \* $P < 0.05$ , \*\* $P < 0.01$ . Data in panels B and E were analyzed by one-way ANOVA followed by Bonferroni's posttest. Data in panel G were analyzed using an unpaired student's t-test.

**Figure 8:  $\beta 5$  blockade impairs hydrolysis of enterocyte cLDs.** (A,B) TG hydrolase activity (A) in primary enterocytes and proximal jejunal TG content (B) at baseline and 2 hours after acute fat challenge in WT mice treated with either  $\beta 5$  blocking antibody or control antibody. N=3-5 mice in each group. Data expressed as Mean  $\pm$  S.E.M. \* $P < 0.05$ . Data were analyzed by one-way ANOVA followed by Bonferroni's posttest.

**Figure 9: Schematic representation showing how MFGE8-mediated fatty acid uptake activates HNF4 $\gamma$ -mediated transcription of *Ces* genes leading to postprandial lipemia.**

**Supplementary Figure 1: MFGE8 regulates enterocyte TG hydrolase activity independent of ATGL.** TG hydrolase activity in WT and *Atgl* int-KO primary enterocytes after treatment with rMFGE8 or RGE control for 1 hour. N=3 independent experiments. Data expressed as Mean  $\pm$  S.E.M. \* $P < 0.05$ , \*\* $P < 0.01$ . Data were analyzed by one-way ANOVA followed by Bonferroni's posttest.

**Supplementary Figure 2: Validation of cytosolic and microsomal fractionation from total intestinal lysate.** Western blot showing relative enrichment of microsomal (BIP) and cytosolic marker (GAPDH) proteins in respective subcellular fractions.

**Supplementary Figure 3: MFGE8 does not impact hydrolysis of cLDs derived from the basolateral surface.** (A-C)  $^3\text{H}$  signal in the total (A), cytosolic fraction (B), microsomal fraction (C), and the ratio of

cytosolic to microsomal radioactive signal (D) in the small intestines from WT and *Mfge8* KO mice 2 hours after i.p injection of <sup>3</sup>H-labeled oleic acid. N=6-8 mice in each group. Data represents merged data from 2 independent experiments. Data expressed as Mean  $\pm$  S.E.M.



## References

1. Miller M, Stone NJ, Ballantyne C, Bittner V, Criqui MH, Ginsberg HN, Goldberg AC, Howard WJ, Jacobson MS, Kris-Etherton PM, Lennie TA, Levi M, Mazzone T, Pennathur S, American Heart Association Clinical Lipidology T, Prevention Committee of the Council on Nutrition PA, Metabolism, Council on Arteriosclerosis T, Vascular B, Council on Cardiovascular N, Council on the Kidney in Cardiovascular D. Triglycerides and cardiovascular disease: a scientific statement from the American Heart Association. *Circulation*. 2011;123(20):2292-333. Epub 2011/04/20. doi: 10.1161/CIR.0b013e3182160726. PubMed PMID: 21502576.
2. Patsch JR, Miesenbock G, Hopferwieser T, Muhlberger V, Knapp E, Dunn JK, Gotto AM, Jr., Patsch W. Relation of triglyceride metabolism and coronary artery disease. Studies in the postprandial state. *Arterioscler Thromb*. 1992;12(11):1336-45. Epub 1992/11/11. doi: 10.1161/01.atv.12.11.1336. PubMed PMID: 1420093.
3. Evans K, Kuusela PJ, Cruz ML, Wilhelmova I, Fielding BA, Frayn KN. Rapid chylomicron appearance following sequential meals: effects of second meal composition. *Br J Nutr*. 1998;79(5):425-9. Epub 1998/07/31. doi: 10.1079/bjn19980072. PubMed PMID: 9682661.
4. Fielding BA, Callow J, Owen RM, Samra JS, Matthews DR, Frayn KN. Postprandial lipemia: the origin of an early peak studied by specific dietary fatty acid intake during sequential meals. *Am J Clin Nutr*. 1996;63(1):36-41. Epub 1996/01/01. doi: 10.1093/ajcn/63.1.36. PubMed PMID: 8604667.
5. Storch J, Zhou YX, Lagakos WS. Metabolism of apical versus basolateral sn-2-monoacylglycerol and fatty acids in rodent small intestine. *Journal of lipid research*. 2008;49(8):1762-9. Epub 2008/04/19. doi: 10.1194/jlr.M800116-JLR200. PubMed PMID: 18421071.
6. Trotter PJ, Storch J. Fatty acid uptake and metabolism in a human intestinal cell line (Caco-2): comparison of apical and basolateral incubation. *Journal of lipid research*. 1991;32(2):293-304. Epub 1991/02/01. PubMed PMID: 2066664.
7. Zimmermann R, Strauss JG, Haemmerle G, Schoiswohl G, Birner-Gruenberger R, Riederer M, Lass A, Neuberger G, Eisenhaber F, Hermetter A, Zechner R. Fat mobilization in adipose tissue is promoted by adipose triglyceride lipase. *Science*. 2004;306(5700):1383-6. Epub 2004/11/20. doi: 10.1126/science.1100747. PubMed PMID: 15550674.
8. Haemmerle G, Lass A, Zimmermann R, Gorkiewicz G, Meyer C, Rozman J, Heldmaier G, Maier R, Theussl C, Eder S, Kratky D, Wagner EF, Klingenspor M, Hoefler G, Zechner R. Defective lipolysis and altered energy metabolism in mice lacking adipose triglyceride lipase. *Science*. 2006;312(5774):734-7. Epub 2006/05/06. doi: 10.1126/science.1123965. PubMed PMID: 16675698.
9. Korbelius M, Vujic N, Sachdev V, Obrowsky S, Rainer S, Gottschalk B, Graier WF, Kratky D. ATGL/CGI-58-Dependent Hydrolysis of a Lipid Storage Pool in Murine Enterocytes. *Cell Rep*. 2019;28(7):1923-34 e4. Epub 2019/08/15. doi: 10.1016/j.celrep.2019.07.030. PubMed PMID: 31412256; PMCID: PMC6713565.
10. Khalifeh-Soltani A, Mckleroy W, Sakuma S, Cheung YY, Sharp K, Qiu Y, Turner SM, Chawla A, Stahl A, Atabai K. Mfge8 promotes obesity by mediating the uptake of dietary fats and serum fatty acids. *Nat Med*. 2014;20(2):175-83. Epub 2014/01/21. doi: 10.1038/nm.3450. PubMed PMID: 24441829; PMCID: 4273653.
11. Khalifeh-Soltani A, Gupta D, Ha A, Iqbal J, Hussain M, Podolsky MJ, Atabai K. Mfge8 regulates enterocyte lipid storage by promoting enterocyte triglyceride hydrolase activity. *JCI Insight*. 2016;1(18):e87418. Epub 2016/11/05. doi: 10.1172/jci.insight.87418. PubMed PMID: 27812539; PMCID: PMC5085605.
12. Aaltonen N, Singha PK, Jakupovic H, Wirth T, Samaranayake H, Pasonen-Seppanen S, Rilla K, Varjosalo M, Edgington-Mitchell LE, Kasperkiewicz P, Drag M, Kalvala S, Moisio E, Savinainen JR, Laitinen JT. High-Resolution Confocal Fluorescence Imaging of Serine Hydrolase Activity in Cryosections - Application to Glioma Brain Unveils Activity Hotspots Originating from Tumor-Associated Neutrophils. *Biol Proced Online*. 2020;22:6. Epub 2020/03/20. doi: 10.1186/s12575-020-00118-4  
118 [pii]. PubMed PMID: 32190011; PMCID: 7073015.
13. Speers AE, Cravatt BF. Activity-Based Protein Profiling (ABPP) and Click Chemistry (CC)-ABPP by MudPIT Mass Spectrometry. *Curr Protoc Chem Biol*. 2009;1:29-41. Epub 2009/01/01. doi: 10.1002/9780470559277.ch090138. PubMed PMID: 21701697; PMCID: 3119539.
14. Dominguez E, Galmozzi A, Chang JW, Hsu KL, Pawlak J, Li W, Godio C, Thomas J, Partida D, Niessen S, O'Brien PE, Russell AP, Watt MJ, Nomura DK, Cravatt BF, Saez E. Integrated phenotypic and activity-based profiling links *Ces3* to obesity and diabetes. *Nat Chem Biol*. 2014;10(2):113-21. Epub 2013/12/24. doi: 10.1038/nchembio.1429  
nchembio.1429 [pii]. PubMed PMID: 24362705; PMCID: 3953460.

15. Chen L, Toke NH, Luo S, Vasoya RP, Fullem RL, Parthasarathy A, Perekatt AO, Verzi MP. A reinforcing HNF4-SMAD4 feed-forward module stabilizes enterocyte identity. *Nat Genet.* 2019;51(5):777-85. Epub 2019/04/17. doi: 10.1038/s41588-019-0384-0. PubMed PMID: 30988513; PMCID: PMC6650150.
16. Lian J, Nelson R, Lehner R. Carboxylesterases in lipid metabolism: from mouse to human. *Protein Cell.* 2018;9(2):178-95. Epub 2017/07/06. doi: 10.1007/s13238-017-0437-z. PubMed PMID: 28677105; PMCID: PMC5818367.
17. Chalhoub G, Kolleritsch S, Maresch LK, Taschler U, Pajed L, Tilp A, Eisner H, Rosina P, Kien B, Radner FPW, Schicho R, Oberer M, Schoiswohl G, Haemmerle G. Carboxylesterase 2 proteins are efficient diglyceride and monoglyceride lipases possibly implicated in metabolic disease. *Journal of lipid research.* 2021;62:100075. Epub 2021/04/20. doi: S0022-2275(21)00057-2 [pii] 10.1016/j.jlr.2021.100075. PubMed PMID: 33872605; PMCID: 8131317.
18. Maresch LK, Benedikt P, Feiler U, Eder S, Zierler KA, Taschler U, Kolleritsch S, Eichmann TO, Schoiswohl G, Leopold C, Wieser BI, Lackner C, Rulicke T, van Klinken J, Kratky D, Moustafa T, Hoefler G, Haemmerle G. Intestine-Specific Overexpression of Carboxylesterase 2c Protects Mice From Diet-Induced Liver Steatosis and Obesity. *Hepatology Commun.* 2019;3(2):227-45. Epub 2019/02/16. doi: 10.1002/hep4.1292 HEP41292 [pii]. PubMed PMID: 30766961; PMCID: 6357831.
19. Ishizaki Y, Furihata T, Oyama Y, Ohura K, Imai T, Hosokawa M, Akita H, Chiba K. Development of a Caco-2 Cell Line Carrying the Human Intestine-Type CES Expression Profile as a Promising Tool for Ester-Containing Drug Permeability Studies. *Biol Pharm Bull.* 2018;41(5):697-706. Epub 2018/05/02. doi: 10.1248/bpb.b17-00880. PubMed PMID: 29709907.
20. Imai T, Ohura K. The role of intestinal carboxylesterase in the oral absorption of prodrugs. *Curr Drug Metab.* 2010;11(9):793-805. Epub 2010/12/30. doi: BSP/CDM/E-Pub/000101 [pii] 10.2174/138920010794328904. PubMed PMID: 21189138.
21. Imai T, Imoto M, Sakamoto H, Hashimoto M. Identification of esterases expressed in Caco-2 cells and effects of their hydrolyzing activity in predicting human intestinal absorption. *Drug Metab Dispos.* 2005;33(8):1185-90. Epub 2005/05/24. doi: dmd.105.004226 [pii] 10.1124/dmd.105.004226. PubMed PMID: 15908471.
22. Khalifeh-Soltani A, Ha A, Podolsky MJ, McCarthy DA, McKleroy W, Azary S, Sakuma S, Tharp KM, Wu N, Yokosaki Y, Hart D, Stahl A, Atabai K. alpha8beta1 integrin regulates nutrient absorption through an Mfge8-PTEN dependent mechanism. *Elife.* 2016;5. Epub 2016/04/20. doi: 10.7554/eLife.13063. PubMed PMID: 27092791; PMCID: PMC4868538.
23. Wisely GB, Miller AB, Davis RG, Thornquest AD, Jr., Johnson R, Spitzer T, Seffler A, Shearer B, Moore JT, Willson TM, Williams SP. Hepatocyte nuclear factor 4 is a transcription factor that constitutively binds fatty acids. *Structure.* 2002;10(9):1225-34. Epub 2002/09/11. doi: S0969212602008298 [pii] 10.1016/s0969-2126(02)00829-8. PubMed PMID: 12220494.
24. Hirai T, Fukui Y, Motojima K. PPARalpha agonists positively and negatively regulate the expression of several nutrient/drug transporters in mouse small intestine. *Biol Pharm Bull.* 2007;30(11):2185-90. Epub 2007/11/06. doi: JST.JSTAGE/bpb/30.2185 [pii] 10.1248/bpb.30.2185. PubMed PMID: 17978498.
25. Black PN, Ahowesso C, Montefusco D, Saini N, DiRusso CC. Fatty Acid Transport Proteins: Targeting FATP2 as a Gatekeeper Involved in the Transport of Exogenous Fatty Acids. *Medchemcomm.* 2016;7(4):612-22. Epub 2016/07/23. doi: 10.1039/C6MD00043F. PubMed PMID: 27446528; PMCID: 4948302.
26. Melton EM, Cerny RL, Watkins PA, DiRusso CC, Black PN. Human fatty acid transport protein 2a/very long chain acyl-CoA synthetase 1 (FATP2a/Acsvl1) has a preference in mediating the channeling of exogenous n-3 fatty acids into phosphatidylinositol. *The Journal of biological chemistry.* 2011;286(35):30670-9. Epub 2011/07/20. doi: S0021-9258(20)72350-1 [pii] 10.1074/jbc.M111.226316. PubMed PMID: 21768100; PMCID: 3162428.
27. Zhao L, Li Y, Ding Q, Chen Y, Ruan XZ. CD36 Senses Dietary Lipids and Regulates Lipids Homeostasis in the Intestine. *Front Physiol.* 2021;12:669279. Epub 2021/05/18. doi: 10.3389/fphys.2021.669279. PubMed PMID: 33995128; PMCID: 8113691.

28. Couillard C, Bergeron N, Prud'homme D, Bergeron J, Tremblay A, Bouchard C, Mauriege P, Despres JP. Postprandial triglyceride response in visceral obesity in men. *Diabetes*. 1998;47(6):953-60. Epub 1998/05/30. doi: 10.2337/diabetes.47.6.953. PubMed PMID: 9604874.
29. Federico LM, Naples M, Taylor D, Adeli K. Intestinal insulin resistance and aberrant production of apolipoprotein B48 lipoproteins in an animal model of insulin resistance and metabolic dyslipidemia: evidence for activation of protein tyrosine phosphatase-1B, extracellular signal-related kinase, and sterol regulatory element-binding protein-1c in the fructose-fed hamster intestine. *Diabetes*. 2006;55(5):1316-26. Epub 2006/04/29. doi: 10.2337/db04-1084. PubMed PMID: 16644688.
30. Zilversmit DB. Atherogenesis: a postprandial phenomenon. *Circulation*. 1979;60(3):473-85. Epub 1979/09/01. doi: 10.1161/01.cir.60.3.473. PubMed PMID: 222498.
31. Tomkin GH, Owens D. The chylomicron: relationship to atherosclerosis. *Int J Vasc Med*. 2012;2012:784536. Epub 2011/10/19. doi: 10.1155/2012/784536. PubMed PMID: 22007304; PMCID: PMC3189596.
32. Ho SY, Delgado L, Storch J. Monoacylglycerol metabolism in human intestinal Caco-2 cells: evidence for metabolic compartmentation and hydrolysis. *The Journal of biological chemistry*. 2002;277(3):1816-23. Epub 2001/10/30. doi: 10.1074/jbc.M108027200. PubMed PMID: 11682480.
33. Lass A, Zimmermann R, Haemmerle G, Riederer M, Schoiswohl G, Schweiger M, Kienesberger P, Strauss JG, Gorkiewicz G, Zechner R. Adipose triglyceride lipase-mediated lipolysis of cellular fat stores is activated by CGI-58 and defective in Chanarin-Dorfman Syndrome. *Cell Metab*. 2006;3(5):309-19. Epub 2006/05/09. doi: 10.1016/j.cmet.2006.03.005. PubMed PMID: 16679289.
34. Schittmayer M, Vujic N, Darnhofer B, Korbelius M, Honeder S, Kratky D, Birner-Gruenberger R. Spatially Resolved Activity-based Proteomic Profiles of the Murine Small Intestinal Lipases. *Mol Cell Proteomics*. 2020;19(12):2104-15. Epub 2020/10/08. doi: S1535-9476(20)60014-7 [pii] 10.1074/mcp.RA120.002171. PubMed PMID: 33023980; PMCID: 7710144.
35. Nassir F, Wilson B, Han X, Gross RW, Abumrad NA. CD36 is important for fatty acid and cholesterol uptake by the proximal but not distal intestine. *The Journal of biological chemistry*. 2007;282(27):19493-501. Epub 2007/05/18. doi: 10.1074/jbc.M703330200. PubMed PMID: 17507371.
36. Datta R, Lizama CO, Soltani AK, McKleroy W, Podolsky MJ, Yang CD, Huynh TL, Cautivo KM, Wang B, Koliwad SK, Abumrad NA, Atabai K. Autoregulation of insulin receptor signaling through MFGE8 and the alphavbeta5 integrin. *Proceedings of the National Academy of Sciences of the United States of America*. 2021;118(18). Epub 2021/04/28. doi: 10.1073/pnas.2102171118. PubMed PMID: 33903257; PMCID: PMC8106306.
37. Lian J, Wei E, Groenendyk J, Das SK, Hermansson M, Li L, Watts R, Thiesen A, Oudit GY, Michalak M, Lehner R. Ces3/TGH Deficiency Attenuates Steatohepatitis. *Sci Rep*. 2016;6:25747. Epub 2016/05/18. doi: 10.1038/srep25747 srep25747 [pii]. PubMed PMID: 27181051; PMCID: 4867576.
38. Lian J, Watts R, Quiroga AD, Beggs MR, Alexander RT, Lehner R. Ces1d deficiency protects against high-sucrose diet-induced hepatic triacylglycerol accumulation. *Journal of lipid research*. 2019;60(4):880-91. Epub 2019/02/10. doi: S0022-2275(20)32600-6 [pii] 10.1194/jlr.M092544. PubMed PMID: 30737251; PMCID: 6446703.
39. Lian J, Wei E, Wang SP, Quiroga AD, Li L, Di Pardo A, van der Veen J, Sipione S, Mitchell GA, Lehner R. Liver specific inactivation of carboxylesterase 3/triacylglycerol hydrolase decreases blood lipids without causing severe steatosis in mice. *Hepatology*. 2012;56(6):2154-62. Epub 2012/06/19. doi: 10.1002/hep.25881. PubMed PMID: 22707181.
40. Atabai K, Fernandez R, Huang X, Ueki I, Kline A, Li Y, Sadatmansoori S, Smith-Steinhart C, Zhu W, Pytela R, Werb Z, Sheppard D. Mfge8 is critical for mammary gland remodeling during involution. *Mol Biol Cell*. 2005;16(12):5528-37. Epub 2005/10/01. doi: E05-02-0128 [pii] 10.1091/mbc.E05-02-0128. PubMed PMID: 16195353; PMCID: 1289399.
41. Cifarelli V, Ivanov S, Xie Y, Son NH, Saunders BT, Pietka TA, Shew TM, Yoshino J, Sundaresan S, Davidson NO, Goldberg IJ, Gelman AE, Zinselmeyer BH, Randolph GJ, Abumrad NA. CD36 deficiency impairs the small intestinal barrier and induces subclinical inflammation in mice. *Cell Mol Gastroenterol Hepatol*. 2017;3(1):82-98. Epub 2017/01/10. doi: 10.1016/j.jcmgh.2016.09.001. PubMed PMID: 28066800; PMCID: 5217470.
42. Love MI, Huber W, Anders S. Moderated estimation of fold change and dispersion for RNA-seq data with DESeq2. *Genome biology*. 2014;15(12):550. Epub 2014/12/18. doi: s13059-014-0550-8 [pii]

10.1186/s13059-014-0550-8. PubMed PMID: 25516281; PMCID: 4302049.

43. Kramer A, Green J, Pollard J, Jr., Tugendreich S. Causal analysis approaches in Ingenuity Pathway Analysis. *Bioinformatics*. 2014;30(4):523-30. Epub 2013/12/18. doi: 10.1093/bioinformatics/btt703

btt703 [pii]. PubMed PMID: 24336805; PMCID: 3928520.

44. Janky R, Verfaillie A, Imrichova H, Van de Sande B, Standaert L, Christiaens V, Hulselmans G, Hertzen K, Naval Sanchez M, Potier D, Svetlichnyy D, Kalender Atak Z, Fiers M, Marine JC, Aerts S. iRegulon: from a gene list to a gene regulatory network using large motif and track collections. *PLoS Comput Biol*. 2014;10(7):e1003731. Epub 2014/07/25. doi: 10.1371/journal.pcbi.1003731

PCOMPBIOL-D-14-00274 [pii]. PubMed PMID: 25058159; PMCID: 4109854.

45. Shannon P, Markiel A, Ozier O, Baliga NS, Wang JT, Ramage D, Amin N, Schwikowski B, Ideker T. Cytoscape: a software environment for integrated models of biomolecular interaction networks. *Genome Res*. 2003;13(11):2498-504. Epub 2003/11/05. doi: 10.1101/gr.1239303

13/11/2498 [pii]. PubMed PMID: 14597658; PMCID: 403769.

46. Grossmann J, Artinger M, Grasso AW, Kung HJ, Scholmerich J, Fiocchi C, Levine AD. Hierarchical cleavage of focal adhesion kinase by caspases alters signal transduction during apoptosis of intestinal epithelial cells. *Gastroenterology*. 2001;120(1):79-88. Epub 2001/02/24. doi: 10.1053/gast.2001.20879. PubMed PMID: 11208716.

47. Gordts PL, Nock R, Son NH, Ramms B, Lew I, Gonzales JC, Thacker BE, Basu D, Lee RG, Mullick AE, Graham MJ, Goldberg IJ, Crooke RM, Witztum JL, Esko JD. ApoC-III inhibits clearance of triglyceride-rich lipoproteins through LDL family receptors. *J Clin Invest*. 2016;126(8):2855-66. Epub 2016/07/12. doi: 10.1172/JCI86610

86610 [pii]. PubMed PMID: 27400128; PMCID: 4966320.

48. Saini N, Black PN, Montefusco D, DiRusso CC. Fatty acid transport protein-2 inhibitor Grassofermata/CB5 protects cells against lipid accumulation and toxicity. *Biochemical and biophysical research communications*. 2015;465(3):534-41. Epub 2015/08/19. doi: 10.1016/j.bbrc.2015.08.055

S0006-291X(15)30445-9 [pii]. PubMed PMID: 26284975; PMCID: 4589248.

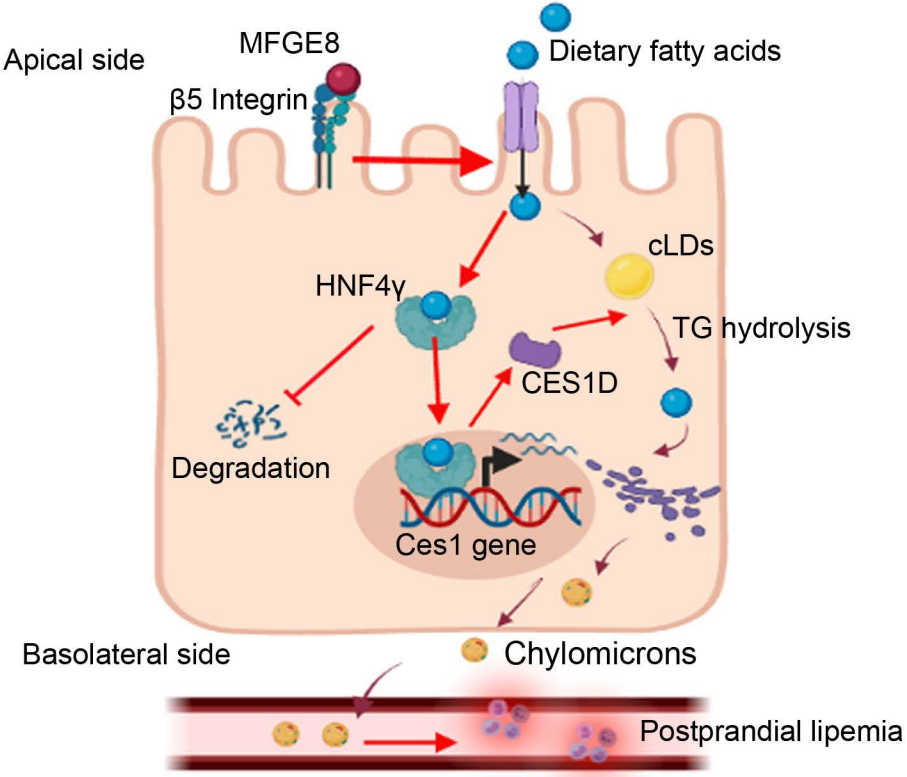

Graphical abstract

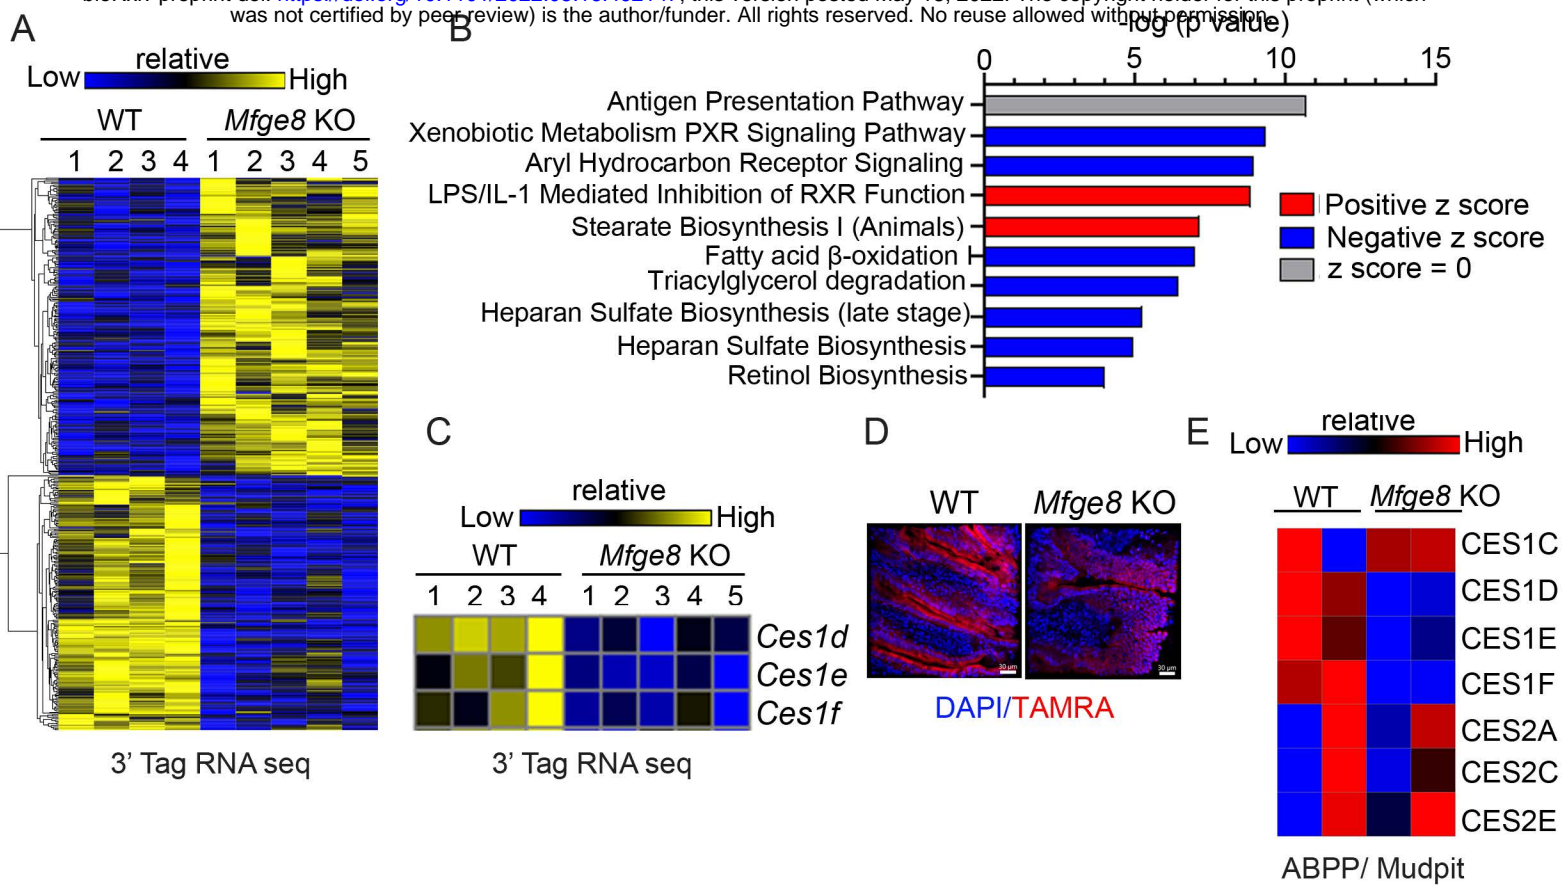

Figure 1

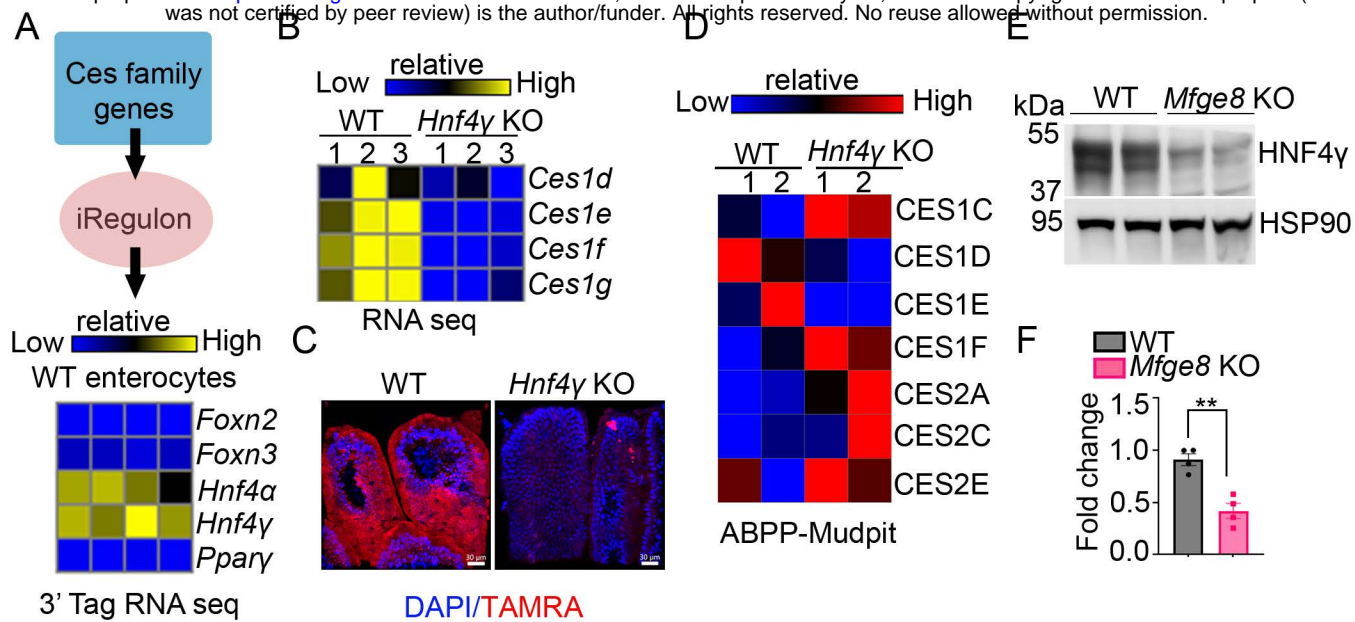

Figure 2

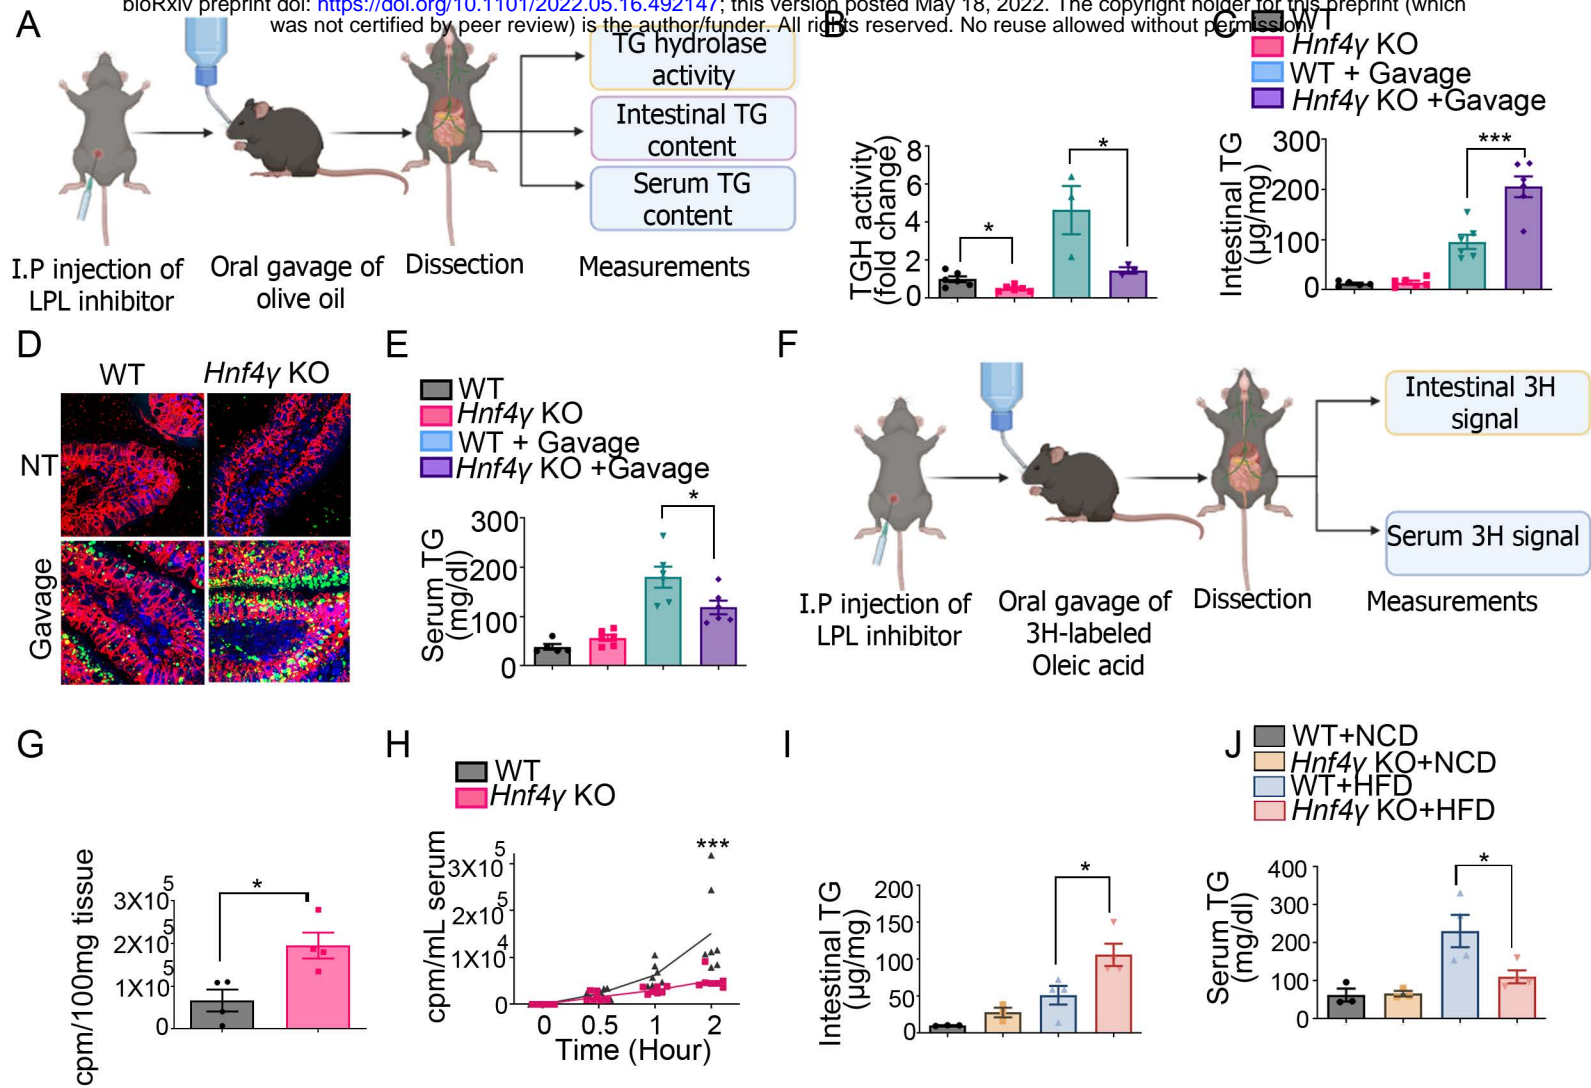

Figure 3



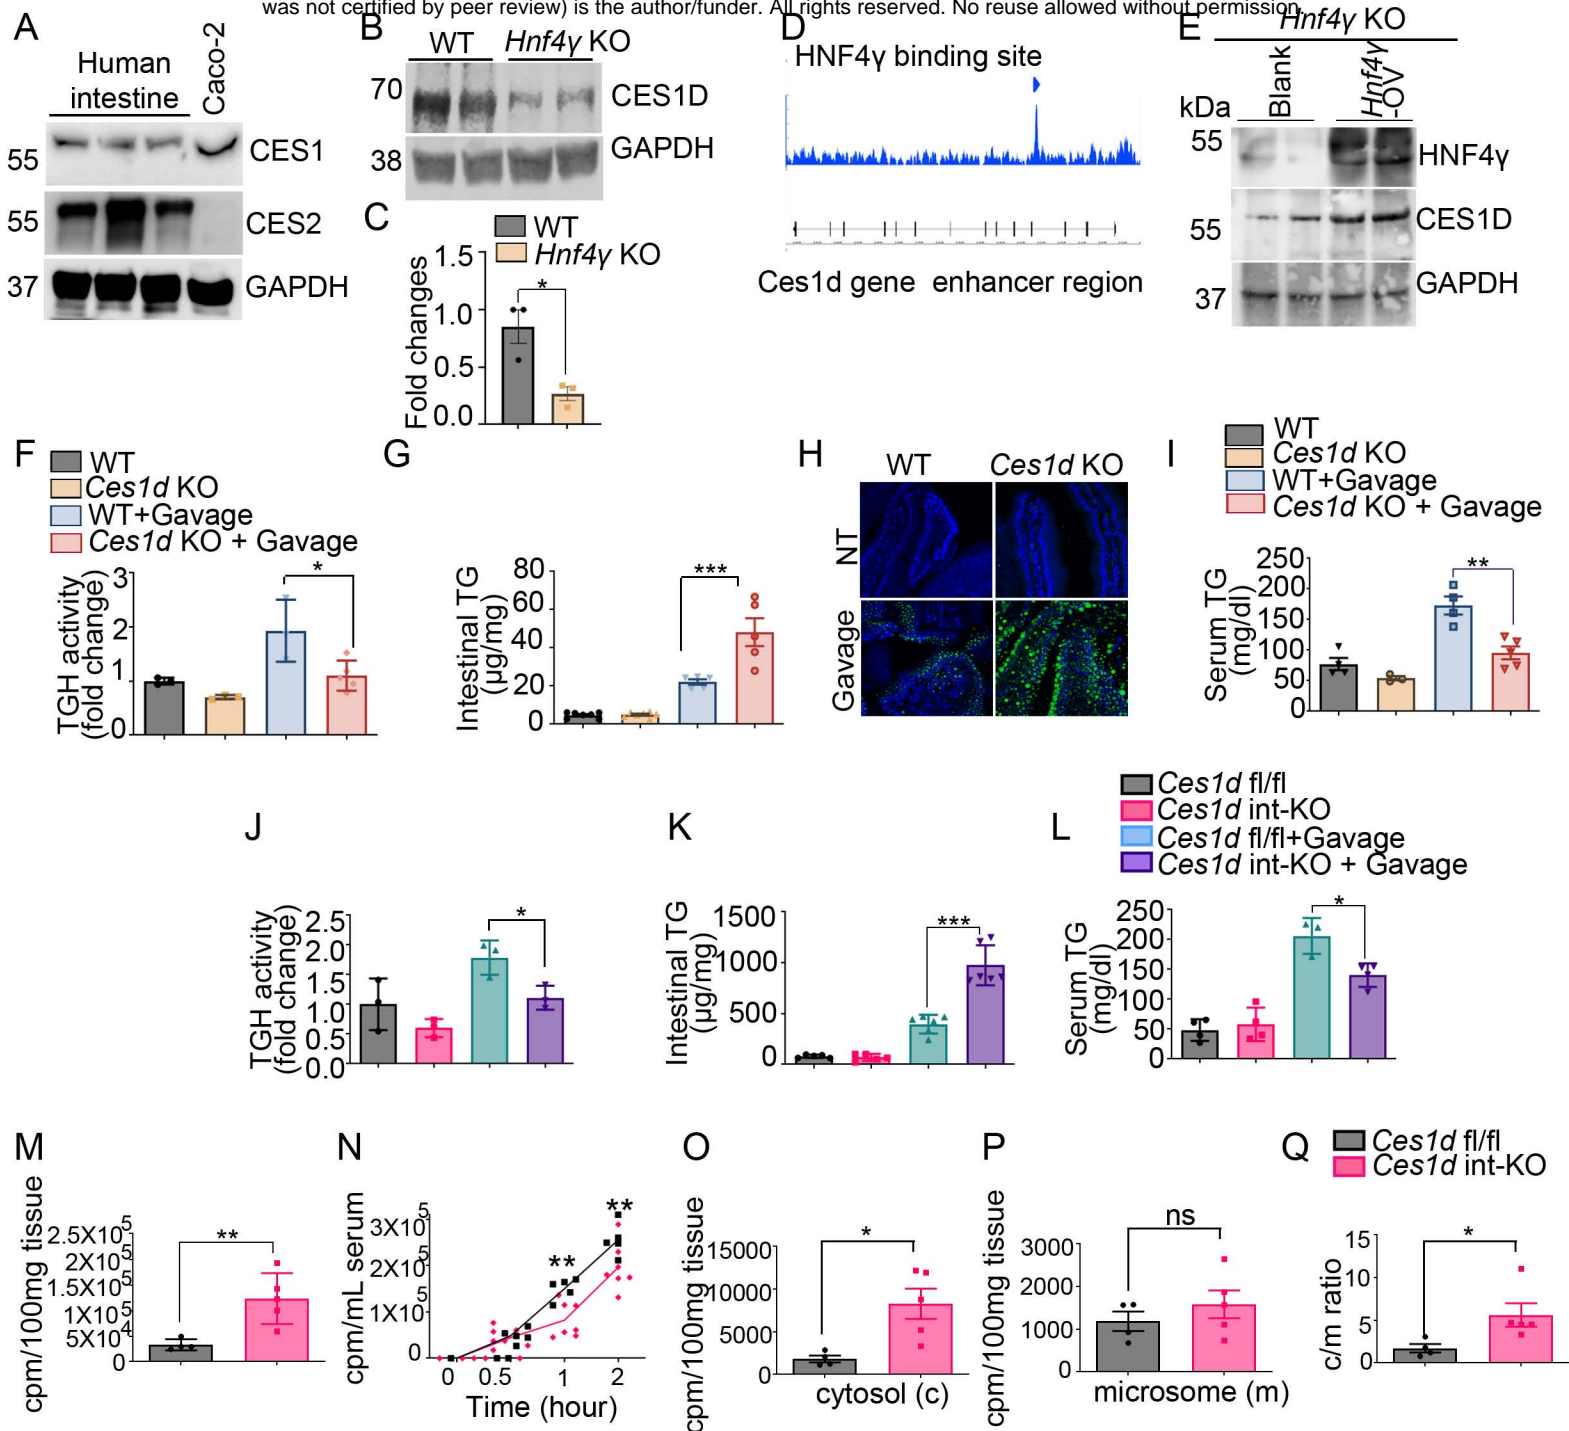

Figure 4

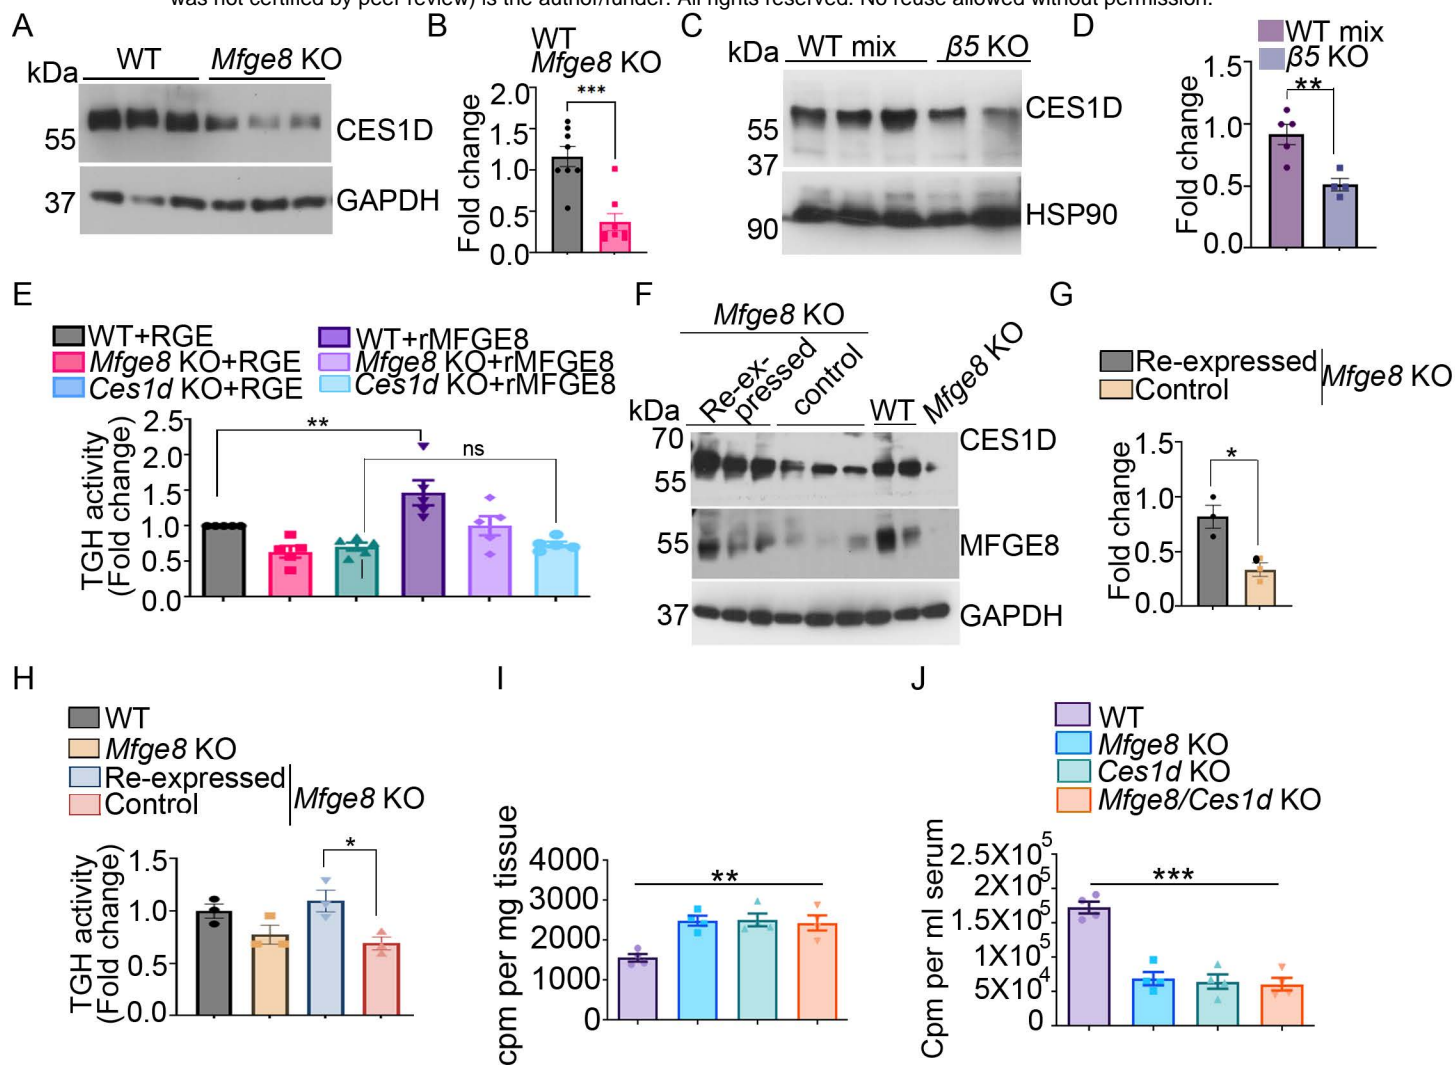

Figure 5

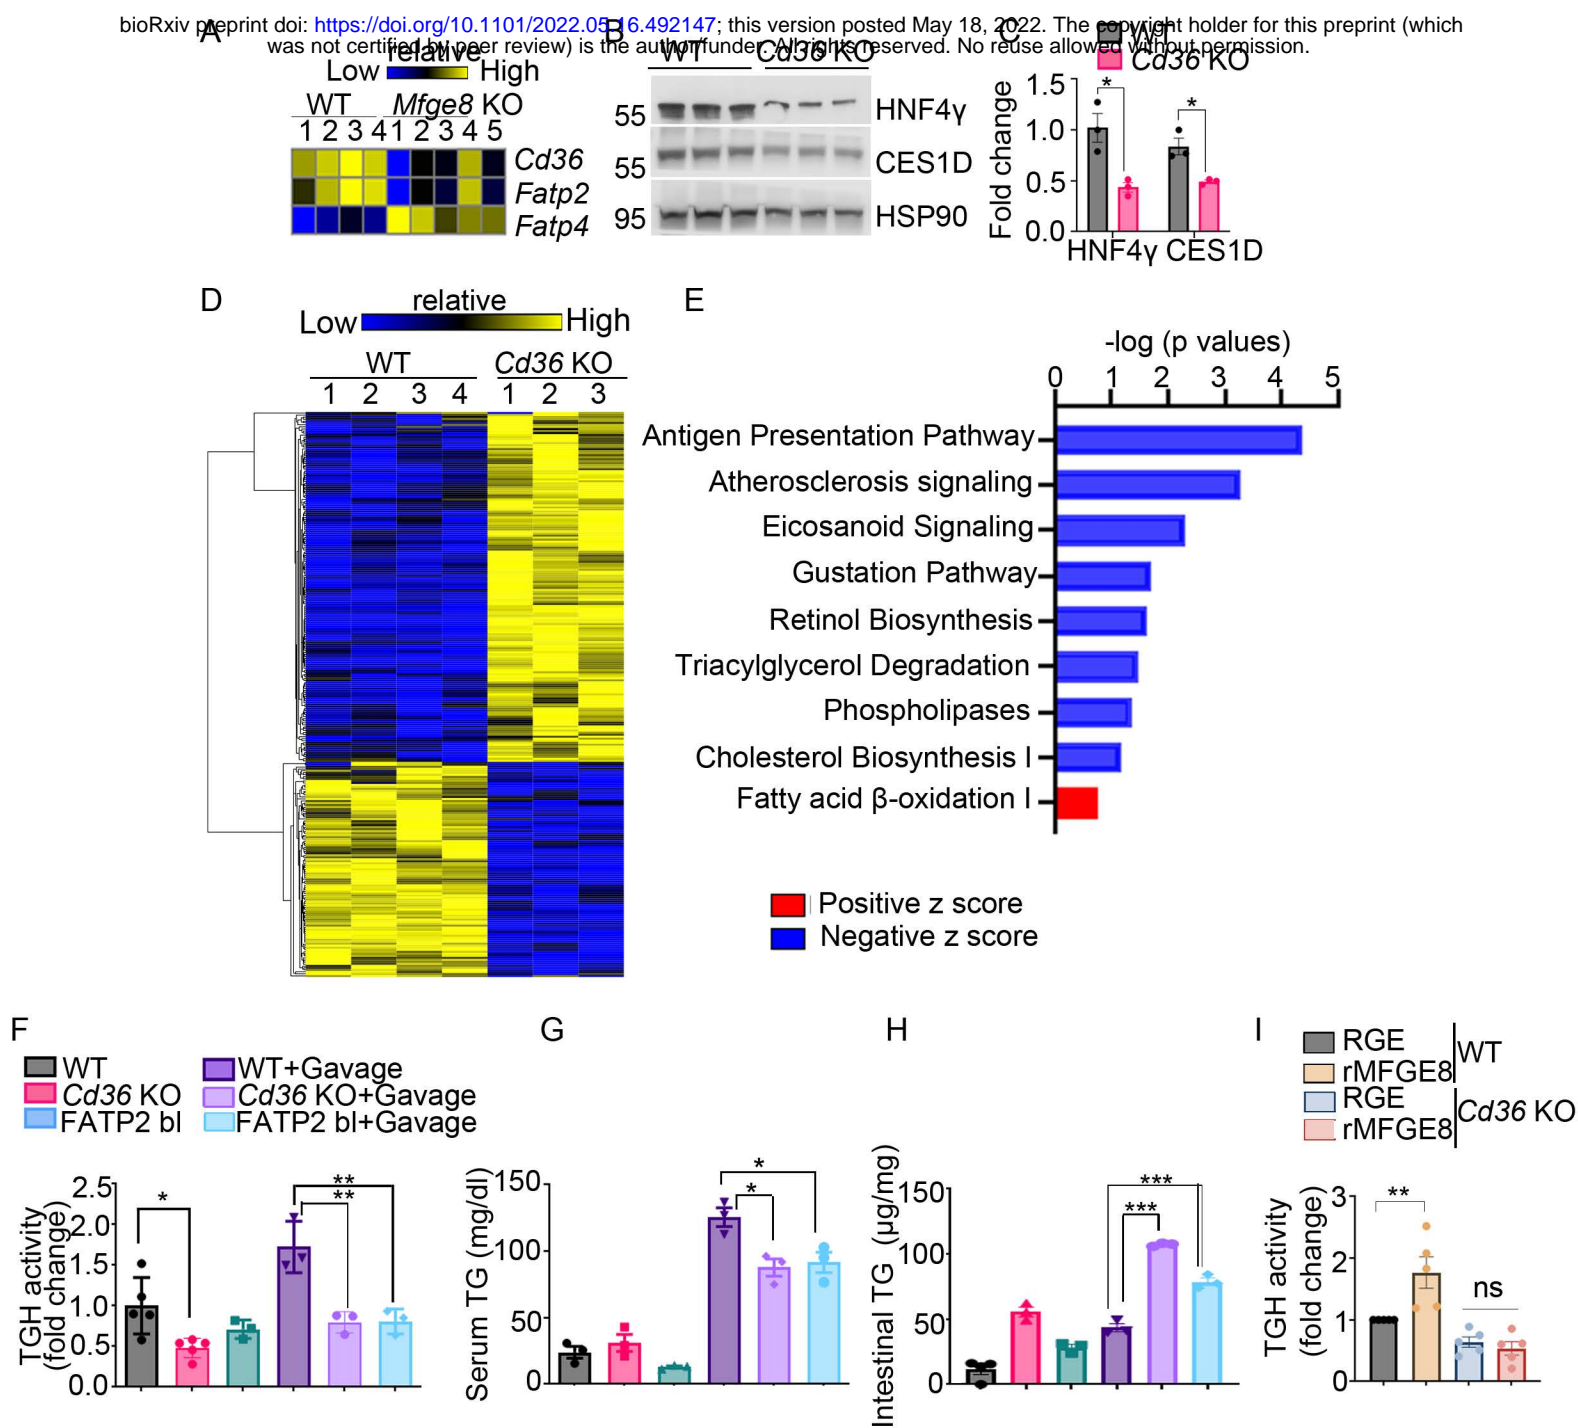

Figure 6

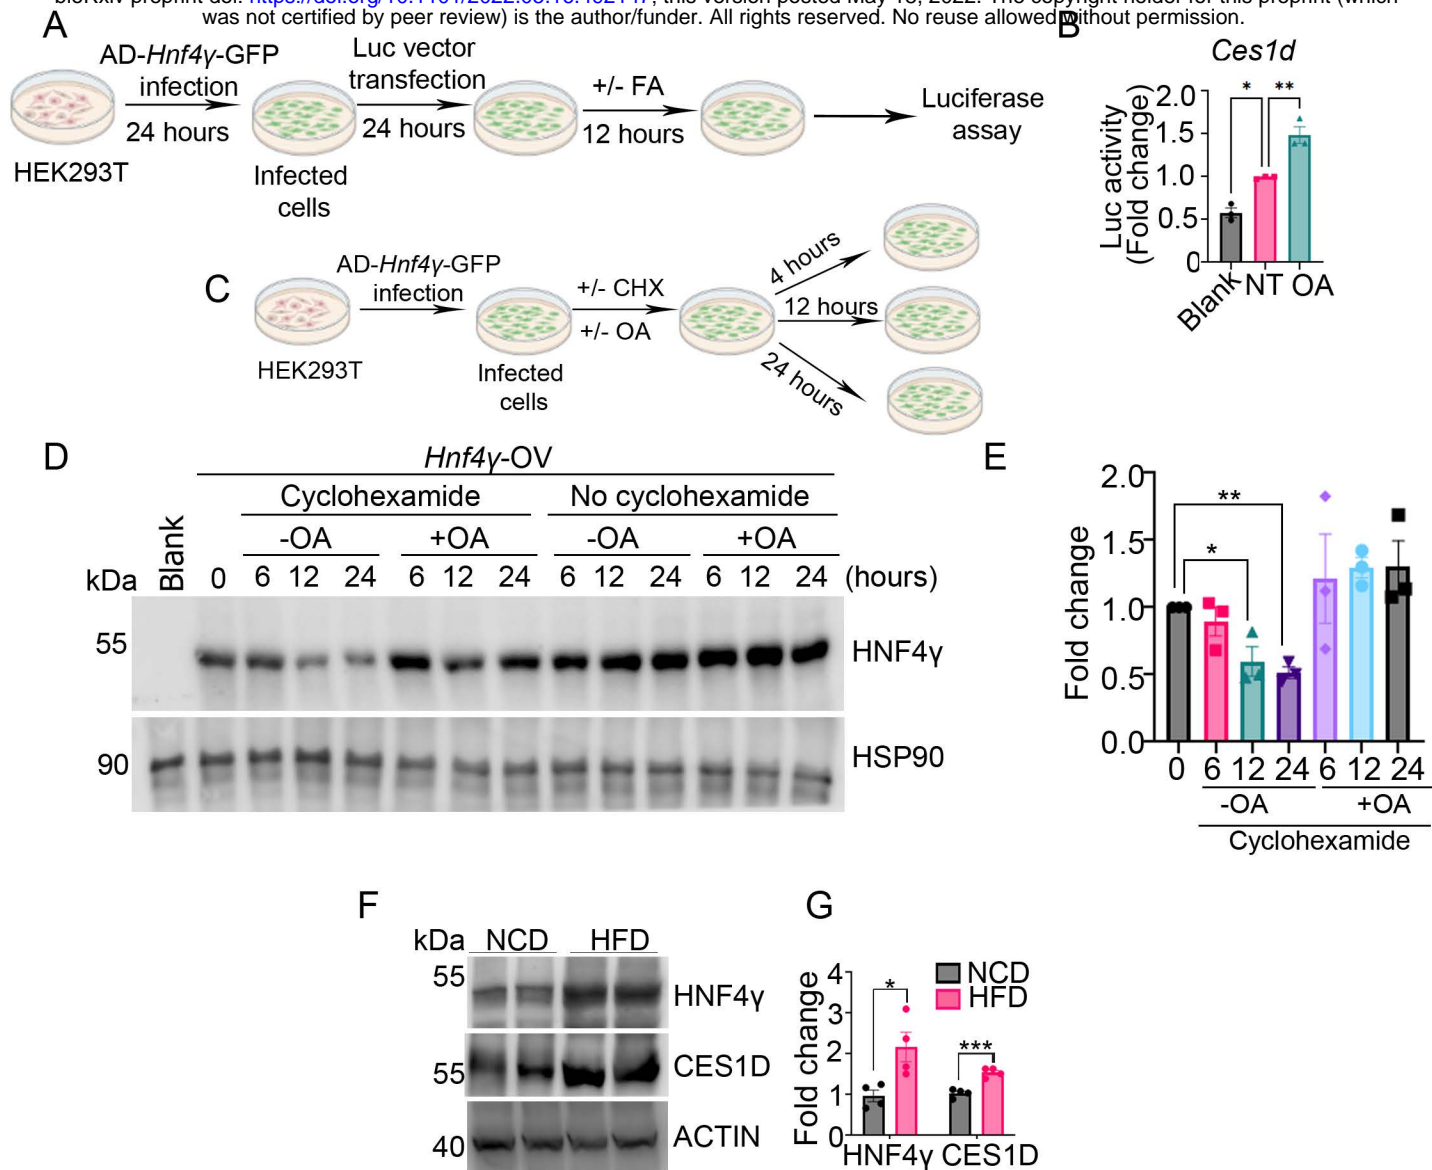

Figure 7

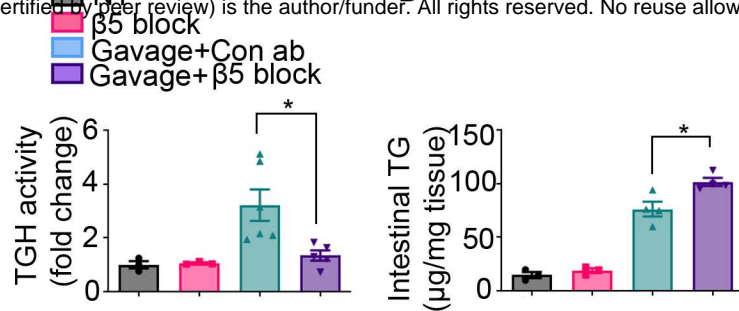

Figure 8

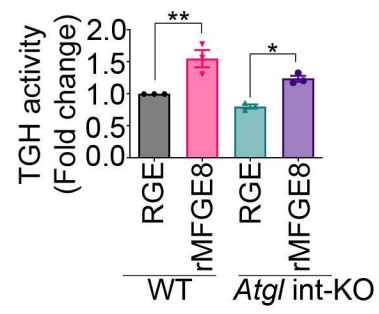

Supplementary figure 1

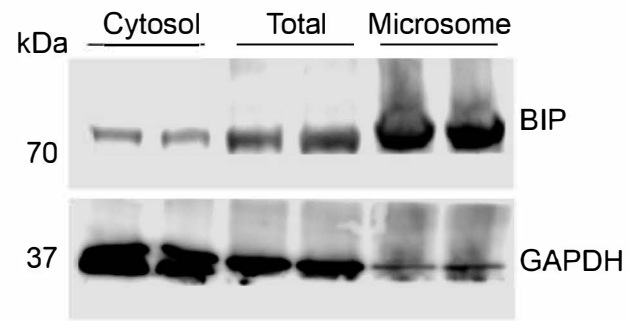

Supplementary figure 2

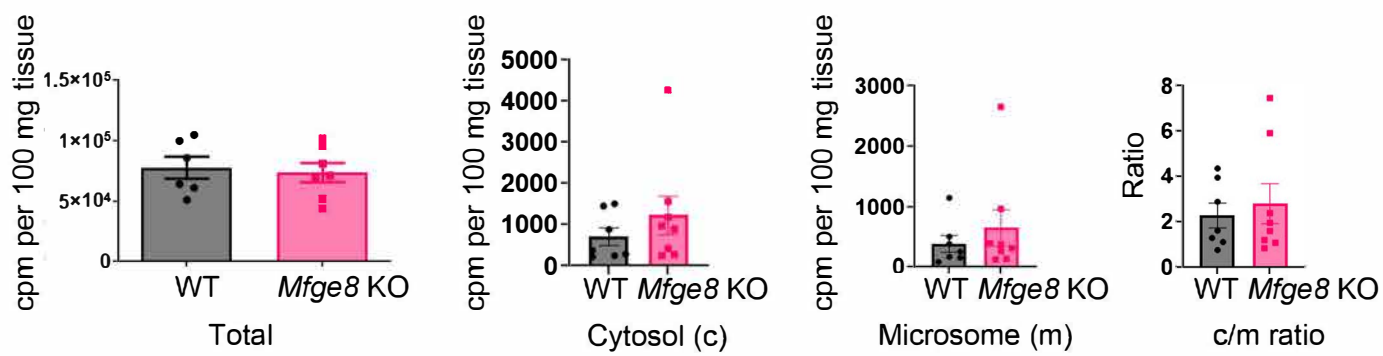

Supplementary figure 3



| Antibody      | Make and Catalog no.               | Host species | Application and dilution |
|---------------|------------------------------------|--------------|--------------------------|
| CES1D         | Santacruz biotechnology, sc-374160 | Mouse        | WB (1:400)               |
| Human CES1    | R & D, AF 4920                     | Goat         | WB (1:500)               |
| Human CES2    | R & D, AF 5657                     | Goat         | WB (1:1000)              |
| HNF4 $\gamma$ | Proteintech, 25802-1AP             | Rabbit       | WB (1:500)               |
| MFGE8         | R & D, AF2805                      | Goat         | WB (1:500)               |
| HSP90         | Santacruz biotechnology, sc-7947   | Rabbit       | WB (1:500)               |
| GAPDH         | Cell signaling technology, 2118    | Rabbit       | WB (1:2000)              |
| EPCAM (CD326) | BD pharmingen, 552370              | Rat          | IF (1:200)               |

**Supplementary Table 1: List of primary antibodies.**
